1 **Quantitative definition of neurobehavior, vision, hearing and brain volumes in macaques**  
2 **congenitally exposed to Zika virus**

3

4 Michelle R. Koenig<sup>1,3</sup>, Elaina Razo<sup>2</sup>, Ann Mitzey<sup>3</sup>, Christina M. Newman<sup>1</sup>, Dawn M.

5 Dudley<sup>1</sup>, Meghan E. Breitbach<sup>1</sup>, Matthew R. Semler<sup>1</sup>, Laurel M. Stewart<sup>1</sup>, Andrea M. Weiler<sup>4</sup>,

6 Sierra Rybarczyk<sup>4</sup>, Kathryn M. Bach<sup>9</sup>, Mariel S. Mohns<sup>1</sup>, Heather A. Simmons<sup>4</sup>, Andres Mejia<sup>4</sup>,

7 Michael Fritsch<sup>1</sup>, Maria Dennis<sup>14</sup>, Leandro B. C. Teixeira<sup>5</sup>, Michele L. Schotzko<sup>4</sup>, T. Michael

8 Nork<sup>6</sup>, Carol A. Rasmussen<sup>6</sup>, Alex Katz<sup>6</sup>, Veena Nair<sup>7</sup>, Jiancheng Hou<sup>7</sup>, Amy Hartman<sup>8</sup>, James

9 Ver Hoeve<sup>6</sup>, Charlene Kim<sup>6</sup>, Mary L. Schneider<sup>9</sup>, Karla Ausderau<sup>9</sup>, Sarah Kohn<sup>7</sup>, Anna S.

10 Jaeger<sup>10</sup>, Matthew T. Aliota<sup>10, #a</sup>, Jennifer M. Hayes<sup>4</sup>, Nancy Schultz-Darken<sup>4</sup>, Jens Eickhoff<sup>15</sup>,

11 Kathleen M. Antony<sup>11</sup>, Kevin Noguchi<sup>12</sup>, Xiankun Zeng<sup>13</sup>, Sallie Permar<sup>14</sup>, Vivek Prabhakaran<sup>7</sup>,

12 Saverio Capuano III<sup>4</sup>, Thomas C. Friedrich<sup>4,5</sup>, Thaddeus G. Golos<sup>3,4, 11</sup>, David H. O'Connor<sup>1,4</sup>,

13 Emma L. Mohr<sup>2\*</sup>

14

15 <sup>1</sup> Department of Pathology and Laboratory Medicine, UW-Madison, Madison, Wisconsin

16 <sup>2</sup> Department of Pediatrics, UW-Madison, Madison, Wisconsin

17 <sup>3</sup> Department of Comparative Biosciences, UW-Madison, Madison, Wisconsin

18 <sup>4</sup> Wisconsin National Primate Research Center, UW-Madison, Madison, Wisconsin

19 <sup>5</sup> Department of Pathobiological Sciences, UW-Madison, Madison, Wisconsin

20 <sup>6</sup> Department of Ophthalmology and Visual Sciences, UW-Madison, Madison, Wisconsin

21 <sup>7</sup> Department of Radiology, UW-Madison, Madison, Wisconsin

22 <sup>8</sup> Department of Communication Sciences and Disorders, UW-Madison, Madison, Wisconsin

23 <sup>9</sup> Department of Kinesiology, UW-Madison, Madison, Wisconsin

24 <sup>10</sup> Department of Veterinary and Biomedical Sciences, University of Minnesota, Minneapolis,

25 Minnesota

26 <sup>11</sup> Department of Obstetrics and Gynecology, UW-Madison, Madison, Wisconsin

27 <sup>12</sup> Department of Psychiatry, Washington University School of Medicine, Saint Louis, Missouri

28 <sup>13</sup> United States Army Medical Research Institute of Infectious Diseases, Fort Detrick, Frederick

29 Maryland

30 <sup>14</sup> Department of Pediatrics, Duke University, Durham, North Carolina

31 <sup>15</sup> Biostatistics and Medical Informatics, UW-Madison, Madison, Wisconsin

32

33 <sup>#a</sup> Current address: Department of Veterinary and Biomedical Sciences, University of

34 Minnesota, Saint Paul, Minnesota

35

36 \*Corresponding author

37 Email: emohr2@wisc.edu

38

39

40 **Abstract**

41 Congenital Zika virus (ZIKV) exposure results in a spectrum of disease ranging from severe  
42 birth defects to delayed onset neurodevelopmental deficits. ZIKV-related neuropathogenesis,  
43 predictors of birth defects, and neurodevelopmental deficits are not well defined in people. Here  
44 we assess the methodological and statistical feasibility of a congenital ZIKV exposure macaque  
45 model for identifying infant neurobehavior and brain abnormalities that may underlie  
46 neurodevelopmental deficits. We inoculated five pregnant macaques with ZIKV and mock-  
47 inoculated one macaque in the first trimester. Following birth, growth, ocular structure/function,  
48 brain structure, hearing, histopathology, and neurobehavior were quantitatively assessed during  
49 the first week of life. We identified the typical pregnancy outcomes of congenital ZIKV infection,  
50 with fetal demise and placental abnormalities. We estimated sample sizes needed to define  
51 differences between groups and demonstrated that future studies quantifying brain region  
52 volumes, retinal structure, hearing, and visual pathway function require a sample size of 14  
53 animals per group (14 ZIKV, 14 control) to detect statistically significant differences in at least  
54 half of the infant exam parameters. Establishing the parameters for future studies of  
55 neurodevelopmental outcomes following congenital ZIKV exposure in macaques is essential for  
56 robust and rigorous experimental design.

57

## 58 **Introduction**

59 A spectrum of abnormalities result from in utero ZIKV exposure and includes birth defects,  
60 termed congenital Zika syndrome, and neurodevelopmental deficits. Approximately 10% of  
61 infants have defects apparent at birth, including ocular anomalies, brain anomalies, cranial  
62 dysmorphologies, congenital contractures and hearing loss (1). Twenty-eight percent of ZIKV-  
63 exposed children are asymptomatic at birth and present with neurodevelopmental deficits in  
64 early childhood (1-4). These neurodevelopmental abnormalities include delays in gross motor,  
65 fine motor, and problem-solving skills (3, 5, 6) along with diminished mobility, communication,  
66 and social cognition (4, 5). There are currently no tools to distinguish the infants that will  
67 develop neurodevelopmental deficiencies from those who will remain asymptomatic, as the  
68 long-term outcomes in children who were born during the 2015-2016 ZIKV epidemic remain to  
69 be fully defined (3, 4, 6-8).

70

71 Translational models of ZIKV infection during pregnancy and subsequent infant  
72 neurodevelopment are necessary to define the neuropathogenesis and early neural predictors  
73 of deficits. Different fetal exposure times during gestation, ZIKV strains, and genetic and  
74 socioeconomic backgrounds all confound our ability to understand the neuropathogenesis of in  
75 utero ZIKV infection in human studies. Furthermore, in human studies, we are unable to  
76 correlate histopathology with functional outcomes. Therefore, translational animal models must  
77 be used to define neuropathogenesis and predictors of deficits, with the end goal of identifying  
78 targets for intervention and therapy (9-11).

79

80 Currently, there is no established nonhuman primate model for defining the neuropathogenesis  
81 of the most common phenotype of congenital ZIKV infection: children who develop  
82 neurodevelopmental deficits but lack the birth defects found in congenital Zika syndrome (12).

83 Early macaque studies have provided insight into in utero ZIKV infection and defined fetal  
84 neuropathology of gestational ZIKV infection (11, 13, 14), placental pathology (13), fetal tissue  
85 viral distribution (14-17), and birth defects in neonates (18). None of these studies have defined  
86 long-term neurodevelopmental deficits or outlined a clear study design for how to evaluate long-  
87 term neurodevelopment in congenital ZIKV-exposed infant macaques. Such a study design  
88 needs to be well planned, with proven quantitative neurodevelopmental outcomes and sufficient  
89 sample sizes.

90

91 Before long-term studies defining the pathogenesis of neurodevelopmental deficits in ZIKV-  
92 exposed macaques are undertaken, we must determine whether tests defining  
93 neurodevelopmental outcomes, such as quantitative structural brain imaging, ocular  
94 examinations and hearing tests, are feasible in infant macaques. This feasibility examination  
95 includes translating appropriate human quantitative clinical exams to an infant macaque  
96 population and determining what sample sizes are required for statistically defining differences  
97 between control and ZIKV-exposed infants. These short-term macaque feasibility studies would  
98 be analogous to what is required in human clinical trial work (19, 20).

99

100 This study aims to demonstrate the feasibility of quantitatively defining developmental outcomes  
101 and viral tissue tropism in a macaque model of congenital ZIKV exposure by concentrating  
102 infant exams and tissue viral RNA (vRNA) analyses in the first week of life. We performed the  
103 same qualitative clinical exams that human infants receive to assess for birth defects (21). We  
104 developed a panel of quantitative infant exams to define subtle abnormalities in structural brain  
105 volumes, visual pathway structure and function, hearing and neurobehavior. We defined the  
106 number of infants needed detect significant differences in these quantitative infant exam  
107 parameters in post-hoc power analyses. Tissue viral loads and histopathology were also  
108 assessed in the infant macaques. Our results demonstrate that ZIKV vRNA is not identified in all

109 ZIKV-exposed infants and it is feasible to quantitatively define infant neurodevelopment with  
110 moderately sized studies.

## 111 **Materials and Methods**

### 112 *Study Design*

113 Indian-origin rhesus macaques (*Macaca mulatta*) were inoculated with ZIKV or phosphate  
114 buffered saline (PBS) during the first trimester (term is 165±10 days) (Table 1). All dams were  
115 part of the Specific Pathogen Free (SPF) colony at the Wisconsin National Primate Research  
116 Center (WNPRC) and were free of *Macacine alphaherpesvirus 1* (Herpes B), simian retrovirus  
117 type D (SRV), simian T-lymphotropic virus type 1 (STLV), and simian immunodeficiency virus  
118 (SIV).

119

120 **Table 1. Characteristics of the dams inoculated with ZIKV or PBS.**

|                                            | Dam identification numbers |        |        |        |        | PBS*<br>inoculation |
|--------------------------------------------|----------------------------|--------|--------|--------|--------|---------------------|
|                                            | ZIKV inoculation           |        |        |        |        |                     |
|                                            | 664184                     | 484880 | 795784 | 918724 | 730267 | 020101              |
| Maternal age at conception (years)         | 4                          | 11     | 16     | 14     | 13     | 8                   |
| Number of prior pregnancies                | 0                          | 5      | 4      | 7      | 6      | 3                   |
| Gestational age at ZIKV inoculation (days) | 46                         | 43     | 41     | 50     | 44     | 47                  |

121 \*Phosphate buffered saline (PBS).

122

### 123 *Ethics Statement*

124 All monkeys are cared for by the staff at the WNPRC in accordance with the regulations and  
125 guidelines outlined in the Animal Welfare Act and the Guide for the Care and Use of Laboratory  
126 Animals, the recommendations of the Weatherall report ([https://royalsociety.org/topics-](https://royalsociety.org/topics-policy/publications/2006/weatherall-report)  
127 [policy/publications/2006/weatherall-report](https://royalsociety.org/topics-policy/publications/2006/weatherall-report)), and the principles described in the National

128 Research Council's Guide for the Care and Use of Laboratory Animals. The University of  
129 Wisconsin - Madison Institutional Biosafety Committee approved this work under protocol  
130 number B00000117. See study approval section below for animal protocol details.

131

### 132 *Care & Use of Macaques*

133 All animals were housed in enclosures with required floor space and fed using a nutritional plan  
134 based on recommendations published by the National Research Council. Dams were fed a fixed  
135 formula, extruded dry diet with adequate carbohydrate, energy, fat, fiber, mineral, protein, and  
136 vitamin content. Macaque dry diets were supplemented with fruits, vegetables, and other edible  
137 objects (e.g., nuts, cereals, seed mixtures, yogurt, peanut butter, popcorn, marshmallows, etc.)  
138 to provide variety to the diet and to inspire species-specific behaviors such as foraging. Infants  
139 were fed 5% dextrose for the first 24 hours of life and liquid formula subsequently. To further  
140 promote psychological well-being, animals were provided with food enrichment, structural  
141 enrichment, and/or manipulanda. Environmental enrichment objects were selected to minimize  
142 chances of pathogen transmission from one animal to another and from animals to care staff.  
143 While on study, all animals were evaluated by trained animal care staff at least twice each day  
144 for signs of pain, distress, and illness by observing appetite, stool quality, activity level, and  
145 physical condition. Animals exhibiting abnormal presentation for any of these clinical parameters  
146 were provided appropriate care by certified veterinarians. Prior to all minor/brief experimental  
147 procedures, macaques were sedated using ketamine anesthesia and monitored regularly until  
148 fully recovered from sedation.

149

150 For breeding, the female macaques were co-housed with a compatible male and observed daily  
151 for menses and breeding. Pregnancy was detected by ultrasound examination of the uterus at  
152 approximately 20-24 gestation days (gd) following the predicted day of ovulation. The gd was  
153 estimated (+/- 2 days) based on the dam's menstrual cycle, observation of copulation, and the

154 greatest length of the fetus at initial ultrasound examination which was compared to normative  
155 growth data in this species (22). For physical examinations, virus inoculations, some ultrasound  
156 examinations, and blood and swab collections, the dam was anesthetized with an intramuscular  
157 dose of ketamine (10 mg/kg). Blood samples from the femoral or saphenous vein were obtained  
158 using a vacutainer system or needle and syringe. Pregnant macaques were monitored daily  
159 prior to and after viral inoculation for any clinical signs of infection (e.g., diarrhea, inappetence,  
160 inactivity, fever and atypical behaviors).

161

#### 162 *Inoculation and monitoring*

163 Macaques were inoculated subcutaneously with  $1 \times 10^4$  PFU Zika virus/*H.sapiens-*  
164 *tc/PUR/2015/PRVABC59\_v3c2* (PRVABC59, GenBank: KU501215). This virus was originally  
165 isolated from a traveler to Puerto Rico and passaged three times on Vero cells (American Type  
166 Culture Collection (ATCC): CCL-81). The seed stock was obtained from Brandy Russell (CDC,  
167 Ft. Collins, CO). Virus stocks were prepared by inoculation onto a confluent monolayer of C6/36  
168 cells (*Aedes albopictus* mosquito larval cells; ATCC: CCL-1660) with two rounds of  
169 amplification. The animals were anesthetized as described above, and 1 mL of inoculum at  $1 \times$   
170  $10^4$  PFU dilution in PBS was administered subcutaneously over the cranial dorsum. Post-  
171 inoculation, the animals were closely monitored by veterinary and animal care staff for adverse  
172 reactions or any signs of disease.

173

#### 174 *Pregnancy monitoring and fetal measurements*

175 Weekly ultrasounds were conducted to observe the health of the fetus and to obtain  
176 measurements including fetal femur length (FL), biparietal diameter (BPD), head circumference  
177 (HC), abdominal circumference (AC) and heart rate as previously described (16). Growth curves  
178 were developed for FL, BPD, and HC using mean measurements and standard deviations from



179 Tarantal et al. (22) and the ultrasound measurements were plotted against this normative data.

180 Doppler ultrasounds to measure fetal heart rate were performed biweekly.

181

182 *vRNA isolation from body fluids and tissues and qRT-PCR*

183 RNA was extracted from 300  $\mu$ l of plasma using the Viral Total Nucleic Acid Purification kit  
184 (Promega, Madison, WI, USA) on a Maxwell 16 MDx instrument. qRT-PCR was performed as  
185 previously described (23). The limit of quantification for the assay is 100 copies/mL for qRT-  
186 PCR from plasma. Fetal and maternal-fetal interface tissues were preserved with RNAlater®  
187 (Invitrogen, Carlsbad, CA) immediately following collection. RNA was isolated from maternal  
188 and fetal tissues using the Trizol Plus RNA Purification kit (Invitrogen, Carlsbad, CA) following  
189 the manufacturer's instructions or a similar method described by Hansen et al. (24). In the latter  
190 method, RNA was recovered from up to 200 mg of tissue disrupted in TRIzol (Life Technologies,  
191 Waltham, MA) with 2 x 5 mm stainless steel beads using the TissueLyser (Qiagen, Hilden,  
192 Germany) for 3 minutes at 25 r/s twice. Following homogenization, samples in TRIzol were  
193 separated using Bromo-chloro-propane (Sigma). The aqueous phase was collected and  
194 glycogen was added as a carrier. The samples were precipitated in isopropanol and washed  
195 in 70% ethanol. RNA was fully re-suspended in 5 mM tris pH 8.0.

196

197 *Plaque reduction neutralization test (PRNT)*

198 Macaque serum samples were screened for ZIKV neutralizing antibodies using a plaque  
199 reduction neutralization test (PRNT). Endpoint titrations of reactive sera, using a 90% cutoff  
200 (PRNT90), were performed as described (25) against ZIKV strain PRVABC59. Briefly, ZIKV was  
201 mixed with serial 2-fold dilutions of serum for 1 hour at 37°C prior to being added to Vero cells  
202 and neutralization curves were generated using GraphPad Prism software (La Jolla, CA). The  
203 resulting data were analyzed by nonlinear regression to estimate the dilution of serum required  
204 to inhibit 90% of infection.

205

206 *Whole virion ZIKV-specific binding antibody ELISA*

207 High-binding 96-well ELISA plates (Greiner; Monroe, NC) were coated with 40 ng/well of 4G2  
208 monoclonal antibody, which was produced in a mouse hybridoma cell line (D1-4G2-4-15, ATCC;  
209 Manassas, VA), diluted to 0.8 ng/uL in 0.1M carbonate buffer (pH 9.6) and incubated overnight  
210 at 4°C. Plates were blocked with 1X Tris-buffered saline containing 0.05% Tween-20 and 5%  
211 normal goat serum (cat.# G6767, Sigma-Aldrich, St. Louis, MO) or 1 hour at 37°C, followed by  
212 incubation with  $1.15 \times 10^5$  focus-forming units (ffu)/well Zika virus (PRVABC59, BEI; Manassas,  
213 VA) for 1 hour at 37°C. Serum samples were tested at a dilution of 1:12.5-204,800 in serial 4-  
214 fold dilutions and incubated for 1 hour at 37°C, along with a ZIKV-specific monoclonal antibody,  
215 H24 (10 ug/mL), isolated from a ZIKV-infected rhesus macaque. Horseradish peroxidase  
216 (HRP)-conjugated mouse anti-monkey IgG secondary antibody (Southern BioTech;  
217 Birmingham, AL) was used at a 1:4,000 dilution and incubated at 37°C for 1 hour, followed by  
218 the addition of SureBlue Reserve TMB Substrate (KPL; Gaithersburg, MD). Reactions were  
219 terminated by Stop Solution (KPL; Gaithersburg, MD) after a 7-minute incubation per plate in  
220 the dark. Optical density (OD) was detected at 450 nm on a Victor X Multilabel plate reader  
221 (PerkinElmer; Waltham, MA). Binding was considered detectable if the sample OD value at the  
222 lowest dilution was greater than that of the background OD, defined as the OD value of the  
223 negative control at the lowest dilution plus 2 standard deviations (SD). For samples considered  
224 positive, their OD values for the serial dilution were entered into Prism v8 (GraphPad Software;  
225 San Diego, CA) to determine the 50% effective dilution ( $ED_{50}$ ). Briefly, the  $ED_{50}$  was calculated  
226 by transforming the fold dilution into  $\log_{10}$ . The transformed data was then analyzed using a  
227 sigmoidal dose-response nonlinear regression model. Any sample considered negative was  
228 assigned an  $ED_{50}$  of 12.5, the lowest dilution tested, because  $ED_{50}$  cannot be accurately  
229 calculated below the lowest dilution tested. The  $\log_{10}$  50% effective dilutions ( $ED_{50}$ ) were

230 calculated for IgG binding responses against the whole virion and compared between 0, 7, 14  
231 and 28 dpi time points.

232

### 233 *ZIKV IgM enzyme-linked immunosorbent assay (ELISA)*

234 Infant macaque serum samples were screened for anti-ZIKV IgM antibodies using commercial  
235 human anti-ZIKV IgM ELISA assays targeting ZIKV nonstructural protein 1 (NS1) antigen. We  
236 utilized a sandwich ELISA (cat# ab213327, Abcam, Cambridge, Massachusetts, USA) and an  
237 indirect ELISA (cat# e126689601M, Euroimmun, Mountain Lakes, New Jersey, USA), following  
238 manufacturer instructions. Controls included manufacturer-provided human serum samples and  
239 rhesus macaque serum collected at 0 and 14 days post-infection with PRVABC59 from an adult  
240 rhesus macaque (animal ID 244667). Infant serum samples were run in triplicate. All samples  
241 and controls were read on a Synergy HTX plate reader at 450 nm. Sample values were reported  
242 in "Abcam units" (Abcam) or "ratio" (Euroimmun), which are the ratio of sample serum  
243 absorbance to the absorbance of a manufacturer-provided solution containing the upper limit of  
244 the reference range of non-infected biological sample ("cutoff" (Abcam) or "calibrator"  
245 (Euroimmun)). This method of reporting results is recommended by the manufacturers to control  
246 for inter-assay variability.

247

### 248 *Cesarean delivery and maternal necropsy*

249 All infants were delivered by cesarean section at approximately 155 gestational days (gd),  
250 except for the single fetal demise at 133 gd. Infants were delivered approximately 10 days  
251 before the typical gestational age of a natural birth at the WNPRC (166 gd) to ensure that the  
252 placenta could be collected for evaluation. Amniotic fluid was collected just prior to infant  
253 delivery via aspiration with a syringe and needle inserted through the chorioamniotic  
254 membranes. Sterile instruments were used for the dissection and collection of all maternal and  
255 maternal-fetal interface tissues during the gross post-mortem examination. Each tissue was

256 collected with a unique set of sterile instruments and placed in a separate sterile petri dish  
257 before transfer to RNAlater for ZIKV qRT-PCR or fixed for histology to prevent cross-  
258 contamination.

259

#### 260 *Infant care*

261 After delivery, infants were dried, stimulated and received respiratory support as necessary, and  
262 placed in a warmed incubator. All liveborn infants were transferred to the nursery where they  
263 remained until euthanasia and necropsy on day of life 7-8. Infants were reared in the nursery to  
264 enable continuous access to the infants for testing and to prevent confounding of maternal  
265 rearing differences on neurobehavior. During this period, multiple examinations were completed  
266 as described in Figure 1. Infant weights from day of life (DOL) 0 to DOL 8 were recorded daily  
267 by the nursery staff. The volumes of 5% dextrose and liquid formula consumed by each infant  
268 were recorded.

269

270 **Figure 1. Infant examination schedule.** Infants were evaluated by the Schneider Neonatal  
271 Assessment for Primates (SNAP), ophthalmic exam (OP), optical coherence tomography  
272 (OCT), auditory brainstem response (ABR), visual electrophysiology (EP) and brain MRI prior to  
273 euthanasia and necropsy (NX). Urine (\*) and blood (#) were collected at the indicated times.  
274 Symbols are under the collection line for an individual animal.

275

#### 276 *Neurobehavioral assessments*

277 We evaluated neonatal macaque neurobehavior with a well-validated assessment developed for  
278 rhesus macaques less than 1 month of age, termed the Schneider Neonatal Assessment for  
279 Primates (SNAP) (26-30), which is based on the Brazelton Newborn Behavioral Assessment  
280 Scale (NBAS) (31). The Schneider Neonatal Assessment for Primates (SNAP) (29), a 20 minute  
281 battery of developmental tests, was administered at 1, 3-5, and 6-7 DOL, with the day of birth

282 considered DOL 0 (summarized in S1 table). This assessment captures detailed developmental  
283 behaviors in macaques less than 1 month of age. The SNAP assesses neonatal neurobehavior  
284 using 68 individually scored test items in four constructs (i.e. domains): motor maturity and  
285 activity, orientation, sensory, and state control (S2 table). Testing occurred midway between  
286 feedings at approximately the same time each day. Ratings were based on a five-point Likert  
287 scale ranging from 0 to 2, with a higher value representing higher performance. An average  
288 score was calculated for each of the four constructs. Examiners were trained in standardized  
289 administration and scoring procedures by the SNAP developer, M. Schneider, requiring a  
290 check-out protocol prior to administration. Two examiners (M. Schneider and K. Ausderau)  
291 performed the neurobehavioral testing and scoring to ensure test administration reliability  
292 (>95%).

293

#### 294 *Ophthalmic exam*

295 Infants were anesthetized as described in S3 table for eye exams performed by a human  
296 ophthalmologist with retinal fellowship training (M. Nork). Pupillary reactivity was assessed, and  
297 intraocular pressures were obtained prior to eye dilation with ophthalmic drops (0.05%  
298 proparacaine, tropicamide, phenylephrine). Slit-lamp biomicroscopy and indirect  
299 ophthalmoscopy were performed after pupillary dilation.

300

#### 301 *Optical coherence tomography*

302 Spectral-domain optical coherence tomography (SD-OCT) uses non-invasive light waves to  
303 evaluate the anterior segment of the eye (i.e. the ocular structures anterior to the vitreous) and  
304 the retina. Scans of the retina and anterior segment were carried out in both eyes of most  
305 infants using a Heidelberg™ Spectralis HRA + OCT (Heidelberg™ Engineering, Heidelberg,  
306 Germany) instrument. Segmentation and determination of corneal and retinal layer thickness  
307 was performed using combined manual and automatic segmentation algorithms from both

308 Heidelberg and EXCELSIOR (32). EXCELSIOR Preclinical's functionalities for retinal  
309 segmentation (EdgeSelect™) and automated image analysis were used to calculate mean  
310 thicknesses for retinal layers.

311

### 312 *Visual electrophysiology*

313 To objectively evaluate visual function in ZIKV-exposed neonatal rhesus macaques, a clinically  
314 trained visual electrophysiologist (J. Ver Hoeve) performed standard visual electrodiagnostic  
315 procedures including a full-field electroretinogram (ERG) and the cortical-derived visual evoked  
316 potential (VEP) (33). The light-adapted (LA) full-field flash ERG, recorded on a rod-saturating  
317 background, measures the electrical activity generated predominantly by cone photoreceptor  
318 and bipolar cells, which are found in high density in the primate macula and are primarily  
319 responsible for light-adapted, high acuity and color vision. The ERG is used clinically to assess  
320 generalized retinal function under light-adapted (focused on cone photoreceptors) and dark-  
321 adapted (focused on rod photoreceptors) conditions (33) and has been used to characterize  
322 maculopathy in acute ZIKV infection (34). The VEP reflects the function of the entire visual  
323 pathway from the retina via the optic nerve to the visual cortex of the brain (33). We performed  
324 standard LA ERGs to measure how the cone photoreceptors function.

325

326 Photopic full-field ERGs to a series of flash strengths and photopic flash visual-evoked  
327 potentials were recorded in that order. Measurements were recorded using a BigShot™  
328 electrodiagnostic system (LKC Technologies™, Gaithersburg, MD). When isoflurane was used  
329 during an earlier procedure in the same sedation event, a washout period was allowed before  
330 visual electrophysiology studies to minimize isoflurane suppression of cortical activity (35).  
331 Corneas were anesthetized with topical 0.5% proparacaine prior to application of ERG-149 jet™  
332 (Universo™, Switzerland) contact lens electrodes and a conductive wetting solution. Reference  
333 electrodes were subdermal stainless-steel needle electrodes inserted near the ipsilateral outer

334 canthus of each eye. Visual evoked potentials were recorded from two active subdermal  
335 electrodes situated approximately 1 cm superior to the occipital ridge and 1 cm lateral to the  
336 midline; VEP reference electrodes were situated adjacent to one another along the midline at  
337 the vertex. Replicates (2-4) of 80 flashes each were performed on each macaque. ERG and  
338 VEP waveforms were processed off-line and machine scored using software written in Matlab™  
339 (Nattick, MA). Photopic flash VEPs were quantified as the root-mean-square of the response  
340 from 50-150 msec post flash. Supplemental Figure 1 illustrates the waveform characteristics  
341 quantified with the ERGs and VEPs.

342

#### 343 *Auditory brainstem response testing*

344 Hearing, or auditory brainstem function, was assessed with auditory brainstem response  
345 audiometry, which measures brainstem evoked potentials generated by a brief click.  
346 Examinations were performed by a human audiologist with pediatric training (A. Hartman).  
347 Auditory brainstem response (ABR) thresholds were obtained for auditory (click) stimuli, as  
348 described in (36), using the Biologic Navigator Pro system. Ambient noise level was minimized.  
349 For the ABR, needle electrodes were placed at the brow ridge (positive input) and behind the  
350 right pinna (negative input) for channel 1 and from the brow ridge (positive input) and behind the  
351 left pinna (negative input) for channel 2. An electrode was placed below the brow ridge on the  
352 forehead for the ground. Electrode impedances were below 10 kohm for all electrodes.  
353 Physiological filters were set to pass 100–3000 Hz. The stimuli were clicks with rarefaction and  
354 condensation alternating polarity and a Blackman window with 2-ms rise-fall and 1 ms plateau  
355 times. Insert earphones (Etymotic ER-3A) were used to obtain the click thresholds. Signal levels  
356 were presented at 70, 50, and 30 dB nHL and wave IV was observed at each presentation level.

357

#### 358 *Brain MRI*

#### 359 *Data acquisition*

360 Neuroimaging data were collected using a 3T MRI scanner (GE750, GE Healthcare, Waukesha,  
361 WI) with a Tx/Rx 8-channel volume coil. Data were acquired in a single session with the  
362 parameters: repetition time (TR) = 9272 ms, echo time (TE) = 4064 ms,  $\theta = 12^\circ$ , field of view  
363 (FOV) = 100 × 100 mm, slice thickness = 0.8 mm. Animals were scanned in the supine position  
364 in the same orientation, achieved by placement and immobilization of the head in a custom-  
365 made head holder via ear bars. Scans were collected under anesthesia described in S3 table.  
366 End-tidal CO<sub>2</sub>, inhaled CO<sub>2</sub>, O<sub>2</sub> saturation, heart rate, respiratory rate, blood pressure and body  
367 temperature were monitored continuously and maintained during each MRI session.

368

### 369 Data processing

370 For structural MRI data processing and analysis, we used the AutoSeg\_3.3.2 pipeline,  
371 developed at the Neuro Image Research and Analysis Laboratories (NIRAL) of the University of  
372 North Carolina at Chapel Hill and publicly available on the NITRC website, at  
373 <http://www.nitrc.org/projects/autoseg>. This software pipeline employs BatchMake pipeline  
374 scripts that call tools within the AutoSeg toolset, based on the Insight Tool Kit (ITK). T1w  
375 DICOMs were initially imported in 3D Slicer (<http://www.slicer.org>) and saved to NRRD format,  
376 and orientation and obliquity of each dataset checked and corrected to LPI (neurological)  
377 orientation using the ANTS software (37). Image processing in AutoSeg proceeded using the  
378 step as described in supplemental figure 2. The first step was to perform an intensity  
379 inhomogeneity correction using the N4 algorithm (38). The second step was to perform rigid-  
380 body registration of the subject MRI to the 2-week old UNC-Emory infant rhesus macaque atlas  
381 (39) using the 3D BRAINSFit (40) tool within 3D Slicer. The third step was tissue segmentation  
382 and skull stripping separating the brain tissues [gray matter (GM), white matter (WM) and  
383 cerebrospinal fluid (CSF)] from non-brain image. AutoSeg uses the Atlas Based Classification  
384 (ABC) tool (41-43) to perform tissue segmentation as well as skull-stripping integrated into a  
385 single method. The fourth step was registration of the atlas to the subject's brain to generate



386 cortical parcellations (affine followed by deformable ANTS registration) (37) to register each  
387 skull-stripped atlas image to the skull-stripped subject image using a cross-correlation similarity  
388 metric and a symmetric diffeomorphic deformation model that preserves anatomical topology  
389 even with large deformation (Figure S2B and S2C). Previous studies have shown that the cross-  
390 correlation metric offers enhanced reliability and accuracy as the image registration metric  
391 within ANTS (44). This analysis outputs volumes of brain WM and GM, CSF, and cortical  
392 (temporal, prefrontal, frontal, parietal, occipital lobes, and cerebellum) and subcortical  
393 (hippocampus, amygdala, caudate, and putamen) regions, which has been previously described  
394 (39, 44).

395

#### 396 *Infant or fetus necropsy*

397 Infants were sedated and euthanized on DOL 7 or 8. Fetus 416597 was stillborn prematurely  
398 and was submitted to necropsy immediately after delivery. Sterile instruments were used for the  
399 dissection and collection of all tissues during gross post-mortem examinations. Each tissue was  
400 collected with a unique set of sterile instruments and placed in a separate sterile petri dish  
401 before transfer to RNAlater for ZIKV qRT-PCR or 4% paraformaldehyde for histology. Ten slices  
402 of the fetal/infant cerebrum (~5 mm in thickness) were prepared in the coronal plane with  
403 section 1 located most anteriorly and section 10 located most posteriorly, and three slices of the  
404 cerebellum were prepared in the sagittal plane with section 1 located most medially and section  
405 3 most laterally; alternate sections were taken for qRT-PCR to analyze vRNA and for histology.

406

#### 407 *Histology*

408 Tissues were fixed in 4% PFA other than cerebrum, cerebellum and one eye for histology which  
409 were fixed in 10% neutral buffered formalin. Tissues were sectioned (~5 mm), routinely  
410 processed and embedded in paraffin. Paraffin sections (5  $\mu$ m and 8  $\mu$ m for the brain) were  
411 stained with HE or Gram stain using standard methods. The pathologists were blinded to vRNA

412 findings when evaluating and describing tissue sections and assigning morphologic diagnoses.  
413 Photomicrographs were obtained using brightfield microscopes Olympus BX43 and Olympus  
414 BX46 (Olympus Inc., Center Valley, PA) with attached Olympus DP72 digital camera (Olympus  
415 Inc.) and Spot Flex 152 64 Mp camera (Spot Imaging, Sterling Heights, MI), and captured using  
416 commercially available image-analysis software (cellSens DimensionR, Olympus Inc. and Spot  
417 5.3 Software). The ear diagram used to describe where ear sections were obtained from is a  
418 composite of multiple histologic sections of infant 020501 with the addition of an external pinna  
419 based on gross images.

420

#### 421 *In situ hybridization*

422 In situ hybridization (ISH) was conducted either in brain tissues post-fixed in neutral buffered  
423 formalin or in non-brain tissues post-fixed in 4% PFA for 24 hours, alcohol processed and  
424 paraffin embedded. ISH probes against ZIKV genome were purchased commercially (Advanced  
425 Cell Diagnostics, Cat No. 468361, Newark, California, USA). ISH was performed using the  
426 RNAscope® Red 2.5 Kit (Advanced Cell Diagnostics, Cat No. 322350) according to the  
427 manufacturer's instructions. Briefly, after deparaffinization with xylene, a series of ethanol  
428 washes, and peroxidase blocking, sections were heated in antigen retrieval buffer and then  
429 digested by proteinase. Sections were exposed to ISH target probe and incubated at 40°C in a  
430 hybridization oven for 2 h. After rinsing, ISH signal was amplified using company-provided Pre-  
431 amplifier followed by the Amplifier containing labelled probe binding sites and developed with a  
432 Fast Red chromogenic substrate for 10 min at room temperature. Sections were then stained  
433 with hematoxylin, air-dried, and mounted. Positive control probes for endogenous rhesus  
434 macaque mRNA (Advanced Cell Diagnostics, Cat No. 457711, Newark, California, USA) and  
435 negative control probes for bacterial mRNA (Advanced Cell Diagnostics, Cat No. 310043,  
436 Newark, California, USA) were used as process controls to verify ISH labelling procedure was

437 successful. Mouse brain tissue served as a positive control for ZIKV ISH in brain tissues and  
438 mouse spleen served as a positive control for ZIKV ISH in non-brain tissues.

439

#### 440 *Statistics*

441 Standardized differences, i.e., effect size  $d$ 's (45), were calculated for quantifying the differences  
442 between ZIKV-exposed and control neonates in specific quantitative infant exam parameters.  
443 Effect sizes  $d$  of 0.2 were considered as small, 0.5 as moderate and  $>0.8$  as large (45). Due to  
444 the small sample sizes of the current study, detecting statistically significant differences in the  
445 quantitative infant exam parameters was not anticipated. However, the current study provided  
446 data to evaluate the distribution of effect sizes for comparing differences ZIKV-exposed and  
447 control neonates in quantitative infant exam parameters. We conducted in depth post-hoc power  
448 and sample size calculations to define the sample sizes required to discern differences between  
449 ZIKV-exposed and control neonates in quantitative infant exam parameters which might be  
450 useful for the planning of future studies. These specific quantitative infant parameters included:  
451 scores for each time point and construct in the neonatal neurobehavior assay (SNAP), each  
452 ocular layer thickness (OCT), each wave characteristic in the visual electrophysiology assays  
453 (ERG and VEP), infant weight gain trajectory, infant cumulative feeding volume, and each brain  
454 region volume (structural MRI). Sample size estimates were performed to detect observed effect  
455 sizes with 80% power at the two-sided 0.05 significance level and were based on a two-sample  
456 t-test with equal variances and assuming either 1:1 or 2:1 sample size allocations between the  
457 ZIKV-exposed and control groups. Both sample size allocations were selected (1:1 and 2:1)  
458 because some study designs have more ZIKV-exposed infants than control infants. The post-  
459 hoc power analysis was conducted using SAS (SAS Institute, Cary, NC, version 9.4) (S1  
460 Appendix) and histograms were generated using R statistical language (R Development Core  
461 Team 2019), version 3.6.3.

462

463 *Data availability*

464 Primary data that support the findings of this study are available at the Zika Open-Research  
465 Portal (<https://go.wisc.edu/0n9g6o>). Zika virus/H.sapiens-tc/PUR/2015/PRVABC59-v3c2  
466 sequence data have been deposited in the Sequence Read Archive (SRA) with accession code  
467 SRX2975259. All other data supporting the findings of this study are available within the article  
468 and its supplementary information files.

469

470 *Study approval*

471 The University of Wisconsin-Madison, College of Letters and Science and Vice Chancellor for  
472 Research and Graduate Education Centers Institutional Animal Care and Use Committee  
473 approved the nonhuman primate research covered under protocol number G005401-R01.

474 **Results**

475 *ZIKV inoculation during pregnancy*

476 Five dams were inoculated with ZIKV and one dam was inoculated with PBS in the first  
477 trimester (41-50 gestational days (gd)), as described in Table 1 above. No dams had fever,  
478 rash, or inappetence following inoculation. One dam had a stillbirth at gestational day 133 and  
479 the fetus was found partially delivered. The remaining infants were delivered by cesarean  
480 delivery at 154-155 gd (term = 166.5 gd) (45) (Figure 2) to ensure collection of maternal-fetal  
481 interface (MFI) tissues. Maternal plasma viremia peaked 3-5 days post inoculation, and 4 of 5  
482 animals had extended plasma viremia for at least 28 days (S3A figure). The dams also  
483 developed the expected immune response to the virus: ZIKV-specific neutralizing and binding  
484 antibodies were detected at 28 dpi and persisted until the last time point measured at necropsy  
485 (S3B and C figure, S4 figure).

486

487 **Figure 2. Pregnancy experimental design, maternal plasma vRNA loads and maternal**  
488 **antibody responses.** Pregnant macaques were inoculated with ZIKV-PR (all colors) or PBS  
489 (grey color) in the first trimester. One female had a stillbirth at 133 gestational days (gd).  
490 Maternal blood was obtained at the times indicated for each animal (vertical lines on each  
491 animal's timeline) and ultrasound analyses of the fetus and placenta were performed weekly  
492 (black vertical lines).

493

494 Pregnancy course and fetal ultrasonography

495 None of the fetuses had microcephaly (defined as less than 2 SD below the mean) in the  
496 ultrasound immediately prior to delivery, even though there was variability in head  
497 circumference compared with the normative mean throughout gestation (Figure 3). The fetuses  
498 also did not have a femur length or abdominal circumference that was greater than 2 SD below  
499 the mean just prior to delivery (S5A and B figure). The single fetal demise (664184) was  
500 identified by an absent fetal heart rate, and this was preceded by decreasing fetal heart rate  
501 (bradycardia) from gd85 until stillbirth at gd133 when the fetus (416597) was found partially  
502 delivered (S5C figure). The remaining four fetuses had no life-threatening events in utero.

503

504 **Figure 3. Fetal head growth during pregnancy.** Fetal ultrasonography depicting head  
505 circumference (A) and biparietal diameter (B) during gestation. The growth curve standard  
506 deviation (SD) was calculated from normative fetal rhesus macaque measurements (22).

507 Maternal-fetal interface vRNA tissue distribution and histopathology

508 Histologic evaluation of maternal-fetal interface (MFI) tissues revealed minimal to moderate  
509 inflammation in the ZIKV-infected pregnancies (Figure 4 and S4 table), whereas the control  
510 pregnancy had none. The ZIKV-inoculated and control dams revealed some degree of maternal

511 vascular malperfusion, a common finding in the macaque placenta (46, 47). One dam, 664184,  
512 had a large uterine diverticulum (outpouching of the uterine wall) with severe segmental uterine  
513 infarction, necrosuppurative inflammation, and ischemic necrosis, confounding interpretation of  
514 the stillbirth.

515

516 **Figure 4. Placental bed and placental villous pathology.** (A-F) Uterine placental bed  
517 histology reveals minimal to severe lymphoplasmacytic myometritis or neutrophilic to  
518 lymphoplasmacytic endometritis (caret symbol) in 4 of 5 ZIKV-exposed dams (A, B, C, E) but  
519 not in one of the ZIKV-exposed dams (D) or control decidua (F). (G-L) Within the placenta, 3 of  
520 the 5 ZIKV-exposed pregnancies have villitis (arrow heads) (H, I, J) but not in 2 of the ZIKV-  
521 exposed dams (G, K) or a control placental villi (L). Colors of macaques in each image  
522 represent individual animals as depicted at the top of the figure. Scale bar is 100  $\mu$ m.

523

524 Two of the five ZIKV-exposed animals had detectable RNA (by qRT-PCR or ISH) in the  
525 maternal-fetal interface tissues at the time of delivery (Figure 5). The decidua of ZIKV-exposed  
526 dam 795784 had ZIKV RNA of 56 copies/mg detected by qRT-PCR. ZIKV-exposed dam 644184  
527 had ZIKV RNA detected by ISH in the decidua and amniotic/chorionic membrane. However,  
528 ZIKV RNA was not detected in the uterine placental bed, uterus, vagina, placental discs,  
529 umbilical cord or amniotic fluid.

530

531 **Figure 5. Viral loads and ISH in the maternal-fetal interface.** (A) Viral loads were assessed  
532 in female reproductive and fetal extraembryonic tissues by qRT-PCR at delivery and sections of  
533 some of these tissues were assessed by ISH. (B) Positive ZIKV ISH in the decidua of dam  
534 664184. (C) Positive ISH staining in the amniotic/chorionic membrane of fetus 416597. ND = not  
535 detected (below the limit of detection), NT = not tested, NC = not collected, NA = not applicable.

536 Infant clinical courses

537 Four of the five ZIKV-exposed and control infants required noninvasive respiratory support  
538 during resuscitation efforts after delivery (S5 table); it is unclear whether the need for respiratory  
539 support at this premature gestational age is unusual because there is not a large cohort of  
540 infants delivered before gd165 by cesarean section at WNPRC available for comparison. One  
541 infant had significant respiratory disease (499874), requiring noninvasive respiratory support for  
542 almost a day after delivery, and then again following sedated exams. No clinical etiology of for  
543 the respiratory symptoms were identified as the chest x-ray was unremarkable. Following  
544 placement in the nursery, all infants underwent a rigorous schedule of qualitative and  
545 quantitative assessments as described in Figure 1.

546 Infant viral loads and antibody responses

547 We did not identify a ZIKV-specific IgM response in the ZIKV-exposed infants (S6A and B  
548 figure). Plasma, urine and CSF viral loads were also negative in the ZIKV-exposed infants (S6C  
549 figure). Neutralizing antibody concentrations in infants are comprised of vertically transmitted  
550 maternal IgG antibodies and some fetal-derived IgG (48). The neutralizing antibody  
551 concentration in the infants was lower than the maternal neutralizing antibody concentration in  
552 all the ZIKV-exposed infants (S6D figure, with infant neutralizing antibody dilution curves in S7  
553 figure).

554 Infant growth and feeding volume sample size estimation

555 Infant weight gain and formula consumption were monitored closely to evaluate for secondary  
556 effects of dysphagia, or difficulty swallowing, which affects some children with congenital Zika  
557 syndrome (49). We demonstrate that all the infants gained weight and had increasing  
558 cumulative feeding volumes during their first week of life (Figure 6A & 6B). In order to determine  
559 whether our study was powered to detect differences in weight gain and feeding volume

560 trajectories between groups, we conducted post-hoc power and sample size calculations based  
561 on observed effect sizes. Large effects sizes were observed for both weight gain trajectory  
562 ( $d=1.23$ ) and cumulative feeding volumes ( $d=0.9$ ). We demonstrate that the sample size  
563 required to define differences between the weight gain trajectories in ZIKV-exposed and control  
564 infants is 12 infants per group (Figure 6C). A larger group of infants ( $n=21$  per group) is required  
565 to define significant differences between cumulative feeding volumes (Figure 6C).

566

567 **Figure 6. Infant weight gain, cumulative feeding volumes, and sample size estimates.**

568 Cumulative feeding volumes (A) and weights (B) were measured during their first week of life.  
569 Observed effect sizes and sample size requirements (C) for detecting observed effect sizes for  
570 weight gain and feeding volume trajectory with 80% power at the two-sided 0.05 significance  
571 level, assuming a sample size allocation of 1:1 and 1:2 ZIKV to control animals.

572 Infant neurobehavioral development

573 The ZIKV-exposed infants had similar trending scores as the control infant in multiple domains  
574 of neonatal neurobehavior, including orientation, motor maturity and activity, sensory and state  
575 control (Figure 7). The only domain in which the ZIKV-exposed infants had a lower trending  
576 score than the control infant was in one of the time points of the orientation construct (Figure  
577 7A), which assesses both visual and auditory orientation skills. We did not statistically define  
578 differences between ZIKV-exposed and control groups because of our small sample size and  
579 because published normative data for neonatal neurobehavior do not match our infant  
580 population closely enough to be useful as a comparator due to the early delivery in our sample  
581 (29, 30). To determine what sample size will be necessary in future studies to statistically define  
582 differences between ZIKV-exposed and control groups, we calculated effect sizes and  
583 performed sample size assessments for each construct and time point, resulting in 12 effect and  
584 sample size calculations (S6 table). We developed a histogram showing the distribution of the



585 effect sizes (Figure 7E). The histogram demonstrates that 25% of the effect sizes are >1.5  
586 (Figure 7E), which corresponds to a sample size of 8 infants or less per group required to  
587 statistically define differences between ZIKV-exposed and control infants (S6 table). The  
588 constructs with the most difference between groups, i.e. effect size > 1.5, included time points in  
589 the motor maturity and activity construct, and the orientation construct (S6 table). This means  
590 that sample sizes of at least 8 animals per group are needed to statistically define differences in  
591 25% of neonatal neurobehavioral parameters.

592

593 **Figure 7. Neurobehavioral assessment.** The (A) Orientation construct, (B) Motor Maturity and  
594 Activity construct, (C) Sensory construct and (D) State Control construct were assessed on  
595 three separate days (Trials 1-3) during the infants' 8 days of life before necropsy, as described  
596 in S2 table. Test items are scored from 0-2, with 0 representing no response or performance  
597 and 2 representing a higher performance of the measured behaviors. (E) A histogram illustrates  
598 the distribution of effect sizes for all four constructs at each of the three time points.

599 Infant vision evaluation

600 Two of the ZIKV-exposed infants had minor ocular defects similar to defects observed in human  
601 infants with congenital ZIKV infection, a corneal defect and retinal pigmented epithelium mottling  
602 (S7 table). No other ocular birth defects associated with congenital Zika syndrome were  
603 identified (50), including no optic nerve hypoplasia, choroidal lesions, lens abnormalities or  
604 vitreous opacities. We next quantified the thickness of each ocular layer in the anterior and  
605 posterior segments of the eye by ocular coherence tomography (Figure 8A) because subtle  
606 ocular defects that impact vision may not be apparent on ophthalmic exam. Full thickness ocular  
607 layers (choroid, cornea and retina) did not display much variability between ZIKV-exposed and  
608 control animals (Figure 8B). In contrast, there is more variation in the thickness of individual  
609 retinal layers between animals (Figure 8C). We did not define differences between groups

610 because of our small sample size, and instead estimated effect and sample sizes needed to  
611 define differences for future studies. An effect size of  $>1.5$  corresponds to a sample size of 8  
612 infants or less per group required to statistically define differences between ZIKV-exposed and  
613 control infants (S8 table). Of the 10 ocular layer thicknesses we measured in the anterior and  
614 posterior segment, 4 of the 10 layers had an effect size of  $>1.5$  as shown in a histogram in  
615 Figure 8D. The layers with the largest effect sizes are the ganglion cell layer (GCL), inner  
616 plexiform layer (IPL), outer nuclear layer (ONL) and photoreceptor outer segment layer (S8  
617 table). This means that sample sizes of at least 8 animals per group are needed to statistically  
618 define differences in 4 of the 10 ocular layer parameters. When considering all 10 ocular layer  
619 thicknesses together, the total number of animals needed to define differences in 50% of the  
620 parameters is 13 animals per group, with an observed effect size of 1.16.

621

#### 622 **Figure 8. Ocular and retinal layer thicknesses measured by optical coherence**

623 **tomography.** (A) Retinal layer segmentation was performed using EXCELSIOR Preclinical, and  
624 layers are marked as an example from infant 424847. (B) Thicknesses of the retina, central  
625 cornea and choroid were measured in the ZIKV-exposed and control infants with the designated  
626 color scheme. Values from the left and right eyes are demonstrated with a circle and a square,  
627 respectively. (C) Retinal layer thicknesses were measured using the segmentation  
628 demonstrated in part A for ZIKV exposed and control infants. Both the right and left eyes were  
629 measured in all animals except for animal 499874 whose left eye was not able to be measured  
630 due to anesthesia limitations. (D) A histogram illustrates the distribution of effect sizes for all  
631 ocular layer thicknesses.

632

633 Visual function may be altered in structurally normal eyes, so we assessed retinal function using  
634 electroretinography and visual evoked potentials to assess the cortical visual pathway (Figure  
635 1). The ZIKV-exposed and control infants demonstrated no apparent trends of the retinal

636 function or cortical visual function in electroretinography (Figure 9A) or visual evoked potential  
637 (Figure 9B) studies, respectively. As with the other quantitative neonatal assessments, we  
638 defined effect and sample sizes needed to statistically define differences in future studies. An  
639 effect size of  $>1.5$  corresponds to sample size estimates of 8 animals needed per group to  
640 statistically define differences between ZIKV-exposed and control infants with 80% power at the  
641 two-sided 0.05 significance level (S9 table). Two of the 18 visual pathway parameters assessed  
642 had effect sizes of  $>1.5$  (Figure 9C). The visual pathway parameters with an effect size  $>1.5$  are  
643 the A wave amplitude and latency. When considering all 18 electroretinography and visual  
644 evoked potential parameters together, the total number of animals needed to define differences  
645 in 50% of the parameters is 22 animals per group, with an observed effect size of 0.87.

646

647 **Figure 9. Visual function measured by electroretinography and visual evoked potentials.**

648 (A) Light-adapted ERGs were performed for each infant and the amplitude and latency of the A  
649 and B waves were recorded. Right and left eye values were graphed separately with a square  
650 or circle, respectively. (B) Visual evoked potentials (VEP) were performed on an uncovered right  
651 or left eye, and the amplitude, latency and root-mean-square (RMS) of the N2 and P2 waves  
652 were recorded. (D) A histogram illustrates the distribution of effect sizes for each ERG, VEP,  
653 and RMS value.

654 Infant hearing evaluation

655 We assessed hearing quantitatively with auditory brainstem response testing (Figure 1)  
656 because hearing loss is one of the findings in congenital Zika syndrome (51). One ZIKV-  
657 exposed and one control infant demonstrate a similar trend of auditory brainstem evoked  
658 potential generated by click stimuli, as demonstrated by the wave IV latency (Figure 10A).  
659 These one week old infants display wave IV latencies similar to other neonatal macaques (52),  
660 suggesting that they had normal hearing. Only two infants underwent auditory brainstem

661 response testing because of equipment availability and group differences were not statistically  
662 defined. Instead, we defined the number of animals that will be needed in future studies to  
663 statistically define differences between ZIKV-exposed and control groups in each of the 6  
664 parameters (3 click intensities on the left and right sides). All of the hearing parameters had an  
665 effect size of 1.41, given the small number of infants, which corresponds to a sample size  
666 estimate of 9 animals needed per group to statistically define differences between ZIKV-  
667 exposed and control infants with the observed effect sizes.

668

669 **Figure 10. Hearing measured by auditory brainstem response testing.** (A) Auditory  
670 brainstem response testing Wave IV thresholds to click stimuli. (B) Effect sizes and sample size  
671 requirements for detecting the observed effect sizes with 80% power at the two-sided 0.05  
672 significance level, assuming a sample size allocation of 1:1 and 1:2 ZIKV to control animals.

673

674 Infant brain imaging

675 We found no severe brain abnormalities consistent with congenital Zika syndrome (53) in our  
676 ZIKV-exposed or control infants, including subcortical calcifications, ventriculomegaly, cortical  
677 thinning, gyral pattern anomalies, cerebellar hypoplasia or corpus callosum anomalies on  
678 qualitative neuroradiological interpretation. Next, we evaluated for subtle changes that would not  
679 be apparent on qualitative neuroradiological interpretation by defining structural brain region  
680 volumes of the cortical and subcortical regions (Figure 2B & 2C). A total of 40 brain region  
681 volumes were quantified, including the total volume of regions (cortical, subcortical, CSF)  
682 relative to total brain volume (TBV) or intracranial volume (ICV) to take into account the infant's  
683 brain and head size, respectively (S10 table). The single control infant had the largest total  
684 brain, CSF and lateral ventricle volume of all the infants (Figure 11A), even though it was the  
685 youngest infant at the time of the MRI (020501 was 159 corrected gestational days, whereas the

686 ZIKV-exposed infants were 161-163 corrected gestational days old) (S1 table). The control  
687 infant also had the largest relative total white matter volume as corrected for total brain volume,  
688 and the smallest grey matter volume (Figure 11B). Volumetric brain analyses at this young  
689 neonatal age are challenging because the grey to white matter contrast is limited, and future  
690 studies could improve the imaging results by acquiring and averaging multiple runs of T1w and  
691 T2w images. The biological significance of these volume differences cannot be determined in  
692 this pilot study; longer term studies are being pursued to evaluate these findings.

693

694 To define how many infants will be required in future studies to detect differences between  
695 ZIKV-exposed and control groups, we calculated effect sizes and conducted post-hoc sample  
696 size calculations. Ten of 40 brain region volumes quantified (total volumes and TBV corrected)  
697 had effect sizes of  $>1.5$  (Figure 11C), which corresponds to a sample size of 8 infants per group  
698 required to sufficiently define differences between ZIKV-exposed and control infants (S10 table).  
699 The brain regions with the largest effect sizes included the total brain volume and relative white  
700 matter, gray matter, right temporal auditory region and right temporal visual region corrected by  
701 total brain volume (S10 table). The intracranial volume correction shows similar results as the  
702 total brain volume correction, with 10 of 40 brain regions demonstrating effect sizes of  $>1.0$  (S10  
703 table). In summary, this feasibility study demonstrates that sample sizes of at least 8 infants per  
704 group are sufficient to define differences in 25% of the brain region volumes.

705

#### 706 **Figure 11. Volumetric brain analysis and effect sizes.**

707 (A) Structural MRI measurements in cubic millimeters for total brain volume (TBV), lateral  
708 ventricles and cerebrospinal fluid (CSF). (B) Grey matter and white matter specific areas  
709 corrected for TBV in all infants. (C) A histogram illustrates the distribution of effect for entire  
710 brain regions and regions corrected by TBV (tissue type, cortical regions, subcortical regions).

711 Infant tissue vRNA distribution and histopathology

712 No ZIKV vRNA was identified by qRT-PCR in over 45 tissues and body fluids examined per  
713 infant/fetus at necropsy (S11 table), including multiple brain sections. Brain sections were also  
714 examined by in situ hybridization (ISH) for ZIKV RNA, and there was no positive staining in any  
715 of the fetus/infant brain sections evaluated (S8 figure). We also searched for ZIKV RNA by ISH  
716 of the infant/fetus lung tissue, as this tissue had high viral loads in our previous studies (15), and  
717 in the cochlea, because of the clinical findings of sensorineural hearing loss in human  
718 congenital ZIKV infection, however no fetal/infant lung or cochlea section had positive ZIKV ISH.  
719 The control and ZIKV-exposed infants had similar morphometric measurements at necropsy  
720 (S12 table).

721

722 Histopathology demonstrated two key findings in the ZIKV-exposed infants but not control  
723 infant: neutrophilic otitis media (i.e. middle ear inflammation) in 3 of 5 ZIKV-exposed  
724 fetuses/infants (Figure 12) and bronchopneumonia in 2 of 5 ZIKV-exposed infants (Figure 13),  
725 summarized in S13 table. The infant who had respiratory distress after birth and with each  
726 sedation event (499874) had an unremarkable chest x-ray, but bronchopneumonia was  
727 identified histologically. The other infant with histological bronchopneumonia (226691) had no  
728 respiratory symptoms. Together, this means that 4 of the 5 ZIKV-exposed infants either had  
729 neutrophilic otitis media or bronchopneumonia, and only one of these infants displayed signs of  
730 illness. There were no lesions identified by hematoxylin and eosin (HE) staining in the eye,  
731 brainstem or CNS tissues of any of the ZIKV-exposed infants or in the control infant;  
732 additionally, no remaining tissues had lesions that affected more than one fetus/infant (all tissue  
733 histopathology described in Table S14). HE stained brains had no significant histologic lesions;  
734 quantitative analyses are in progress.

735

736 **Figure 12. Fetus/Infant tissue histopathology of the ear.** Neutrophilic otitis media (40x inset)  
737 is present in 3 of 5 ZIKV-exposed fetus/infants (A, C, D) and not in a control infant (F) or two  
738 ZIKV-exposed infants (B, E). Arrowheads denote the location of the neutrophilic inflammation.  
739 (G) Ear diagram depicting where tissue sections were obtained for the 2x and 40x  
740 magnifications. Macaque colors represent animals as depicted at the top of the figure. Scale bar  
741 is 100  $\mu\text{m}$ .

742

743 **Figure 13. Fetus/Infant tissue histopathology of the lung.**

744 (A-F) Diffuse bronchopneumonia is present in 2 of 5 ZIKV-exposed infants (C, E) but not in a  
745 control infant (F) or 3 of the ZIKV-exposed infants (A, B, D) (images with bronchopneumonia are  
746 denoted with an asterisk). The lung in the stillborn macaque (A) is atelectatic (uninflated) due to  
747 stillbirth. Macaque colors represent individual animals as depicted at the top of the figure. Scale  
748 bar is 100  $\mu\text{m}$ .

749

750 Quantitative infant exam sample size estimations

751 Comprehensively defining infant neurodevelopment and underlying abnormalities requires  
752 understanding how many infants will be needed to define differences between ZIKV-exposed  
753 and control groups. When all the quantitative infant exams are combined, a total of 76 individual  
754 parameters were quantified (S15 table). A sample size of 8 animals per group is adequate for  
755 defining statistically significant differences in 22% of all the quantitative infant exam parameters,  
756 assuming similar observed effect sizes to our population. If the sample sizes increases to 14  
757 animals per group, 51% of the exam parameters will have adequate sample sizes to define  
758 statistically significant differences.

759

760 **Discussion**

761 Our results indicate that it is feasible to define infant development quantitatively with moderately  
762 sized studies. These quantitative infant exam results generate testable hypotheses about visual  
763 pathway abnormalities in congenitally ZIKV-exposed infants, which can be assessed in future  
764 appropriately powered studies. We also demonstrate that ZIKV vRNA is not identified in all  
765 ZIKV-exposed infants and identify a novel pathological finding in ZIKV-exposed infants:  
766 neutrophilic acute otitis media and bronchopneumonia. This battery of quantitative infant  
767 macaque-adapted exams complemented by histopathological analyses may be useful for  
768 defining early predictors of abnormal development in congenital ZIKV infection and other  
769 congenital infections, such as cytomegalovirus.

770

771 This model of congenital ZIKV exposure is similar to human clinical studies where maternal  
772 infection is confirmed and no ZIKV vRNA or IgM is detected in the infants (21, 54-56). The lack  
773 of ZIKV vRNA or IgM in infants may occur if fetuses clear the infection before delivery and/or  
774 clear an early IgM response before delivery. Another reason may be a lower inoculation dose  
775 and earlier inoculation compared with the only other macaque model that has isolated ZIKV  
776 vRNA in liveborn macaque (18). We identified ZIKV vRNA in the maternal-fetal interface of 2 of  
777 the 5 dams at delivery, a similar pattern to other macaque studies (15-17, 57, 58),  
778 demonstrating vRNA persistence in some compartments for a long duration. The lack of vRNA  
779 and IgM in infant body fluids occurs commonly in human infants exposed to ZIKV in utero (59-  
780 61). This is why human clinical trials do not require evidence of ZIKV RNA in infant body fluids  
781 or ZIKV-specific IgM to enroll infants into studies characterizing the long term outcomes of  
782 children born to women with documented or suspected ZIKV infection during pregnancy. The  
783 challenge in confirming infant infection following documented maternal infection, especially in



784 cases where ZIKV vRNA is present in the maternal-interface at the time of delivery, indicates  
785 that better tools to diagnose infant exposure/infection need to be developed.  
786  
787 This is the first time that sample size estimates have been reported for quantitative  
788 examinations in infant macaques, although there are limitations to our sample size estimates. A  
789 limitation of our sample size calculations is that they are based on measurements from only five  
790 infants (4 ZIKV-exposed and 1 control) and were performed only in the early neonatal period.  
791 We concentrated our exams in this early period because we wanted to define ZIKV vRNA tissue  
792 tropism in neonates before infection was cleared and wanted to associate viral tropism with the  
793 development of birth defects. Given that we did not identify any ZIKV vRNA in the infants and  
794 did not identify any severe birth defects, we felt it was a better use of precious resources to  
795 assign future pregnant animals to studies of long-term neurodevelopment, rather than include  
796 additional control animals in this short-term study. Studies of long-term neurodevelopment are  
797 better suited for macaque studies because the incidence of congenital ZIKV-associated  
798 developmental deficits is more common than congenital ZIKV syndrome-associated birth  
799 defects (1-4). The variance seen in infant exam parameters in the neonatal period may not  
800 represent the variance present later in infancy, so researchers should confirm their own effect  
801 sizes from their own study animals when defining significant differences between ZIKV-exposed  
802 and control animals. Even with our small sample size and the resulting sample size estimation  
803 limitations, these estimations are useful as a starting point for study design and bring the  
804 discussion of effect sizes in congenital infection macaque studies to the forefront.  
805  
806 The quantitative infant exam results generate testable hypotheses about specific visual pathway  
807 abnormalities in congenitally ZIKV-exposed infants. We hypothesized that the visual pathway  
808 may be affected in our ZIKV-exposed infants because it is affected in human infants with  
809 congenital ZIKV infection (62). We wanted to see which parts of the visual pathway may have

810 abnormalities, so we looked for biological connections between quantitative infant exam  
811 parameters with similar large effect sizes. Quantitative measurements may be functionally  
812 related if they have a similar size of difference between groups, i.e. effect size. We identified  
813 multiple parameters with large effect sizes ( $>1.5$ ) functionally related to visual function. These  
814 infant exam parameters include the photoreceptor outer segment layer thickness,  
815 electroretinography A wave latency, temporal visual region volume and SNAP orientation at the  
816 middle time point. These parameters are functionally related: photoreceptor layer thickness  
817 corresponds to photoreceptor function, as measured by the A wave (63), and overall visual  
818 function, as assessed by visual orientation tasks in the SNAP orientation construct (30). Visual  
819 function is also impacted by the organization of the temporal visual region, which is involved in  
820 object, face and scene perception (64) and alterations in this function may impact visual  
821 orientation skills assessed in the SNAP orientation construct. Based on their similar effect sizes  
822 and functional relatedness, we hypothesize that a thinner photoreceptor layer results in  
823 decreased photoreceptor function, smaller visual temporal visual region, and decreased visual  
824 orientation skills. Our hypothesis aligns with the finding that some human children with  
825 congenital ZIKV exposure have a thinned photoreceptor (65). Abnormalities downstream of the  
826 thinned photoreceptor layer remain to be defined in human children, so macaque studies should  
827 fill this void by defining specific visual pathway abnormalities in appropriately powered studies.  
828 Identification of specific structural abnormalities in young infants that are associated with visual  
829 function deficits in childhood could provide a pathway for early diagnosis of neurodevelopmental  
830 deficits.

831  
832 We identified neutrophilic otitis media and bronchopneumonia in ZIKV exposed macaque  
833 infants, which is the first time that these acute inflammatory findings have been identified in this  
834 model. Congenital ZIKV infection has not been associated with neutrophilic otitis media before,  
835 although it is associated with sensorineural hearing loss and rarely with conductive hearing loss

836 (66). It is unclear whether the otitis media may be within the range of normal findings on  
837 histopathologic evaluation of neonatal macaques because the prevalence of otitis media in  
838 infant rhesus macaques is unknown. We presume it is a rare finding in macaques because  
839 otitis media is found in only 4% of human neonates less than 2 weeks old (67). We do not know  
840 whether the infants with otitis media in our study had hearing loss because the infants with  
841 histologic changes did not have ABR testing due to lack of equipment early in our study.  
842 Pneumonia is a common cause of death in human infants with congenital ZIKV infection, likely  
843 secondary to dysphagia and reflux (68). The etiology of this acute inflammation may be a  
844 bacterial infection, but this cannot be confirmed in all animals because we only obtained  
845 bacterial cultures on the lung tissue of the symptomatic infant who had respiratory distress. The  
846 functional outcomes of these pathologies included the respiratory distress in one infant; the  
847 remaining infant had no respiratory symptoms. Future long-term neurodevelopmental studies of  
848 congenital ZIKV exposed macaque infants should include sequential hearing tests on all infants  
849 and consider videofluoroscopic swallow studies to better understand the impact of micro  
850 aspiration on pulmonary function.

851  
852 In summary, we demonstrate that moderately size macaque studies are statistically sufficient to  
853 define visual, hearing and brain abnormalities, complementing the qualitative clinical and  
854 histopathological assessments commonly conducted in ours and other macaque models of  
855 prenatal ZIKV exposure (18). Longitudinal studies of macaque development based on this  
856 feasibility study will complement human studies by filling critical knowledge gaps: identification  
857 of early neural predictors of neurodevelopmental deficits and pathogenesis of these deficits.  
858 Early identification of neurodevelopmental deficits is critical to improving long-term functional  
859 outcomes of affected children because early intervention is the only evidence-based  
860 intervention that improves outcomes in children with neurodevelopmental deficits (69).

861

862  
863  
864

865 **Acknowledgements**

866 We thank Nathan Diers, Seth Eaton and Peter Cueno for assistance with OCT segmentation.

867 We thank Clara R. Landucci for making the ear illustration. We thank Marina Emborg for her

868 critical review of the manuscript. We thank Martin Styner for his assistance with the AutoSeg

869 software.

870

871

## 872 References

- 873 1. Rice ME, Galang RR, Roth NM, Ellington SR, Moore CA, Valencia-Prado M, et al. Vital  
874 Signs: Zika-Associated Birth Defects and Neurodevelopmental Abnormalities Possibly  
875 Associated with Congenital Zika Virus Infection - U.S. Territories and Freely Associated States,  
876 2018. *MMWR Morbidity and mortality weekly report*. 2018;67(31):858-67.
- 877 2. Hoen B, Schaub B, Funk AL, Ardillon V, Boullard M, Cabie A, et al. Pregnancy  
878 Outcomes after ZIKV Infection in French Territories in the Americas. *The New England journal*  
879 *of medicine*. 2018;378(11):985-94.
- 880 3. Nielsen-Saines K, Brasil P, Kerin T, Vasconcelos Z, Gabaglia CR, Damasceno L, et al.  
881 Delayed childhood neurodevelopment and neurosensory alterations in the second year of life in  
882 a prospective cohort of ZIKV-exposed children. *Nature medicine*. 2019.
- 883 4. Mulkey SB, Arroyave-Wessel M, Peyton C, Bulas DI, Fourzali Y, Jiang J, et al.  
884 Neurodevelopmental Abnormalities in Children With In Utero Zika Virus Exposure Without  
885 Congenital Zika Syndrome. *JAMA pediatrics*. 2020.
- 886 5. Peçanha PM, Gomes Junior SC, Pone SM, Pone MVdS, Vasconcelos Z, Zin A, et al.  
887 Neurodevelopment of children exposed intra-uterus by Zika virus: A case series. *PloS one*.  
888 2020;15(2):e0229434-e.
- 889 6. Vianna RAO, Lovero KL, Oliveira SA, Fernandes AR, Santos T, Lima L, et al. Children  
890 Born to Mothers with Rash During Zika Virus Epidemic in Brazil: First 18 Months of Life. *Journal*  
891 *of tropical pediatrics*. 2019.
- 892 7. Gerzson LR, de Almeida CS, da Silva JH, Feitosa MMA, de Oliveira LN, Schuler-Faccini  
893 L. Neurodevelopment of Nonmicrocephalic Children, After 18 Months of Life, Exposed  
894 Prenatally to Zika Virus. *Journal of child neurology*. 2019:883073819892128.
- 895 8. Melo AS, Aguiar RS, Amorim MM, Arruda MB, Melo FO, Ribeiro ST, et al. Congenital  
896 Zika Virus Infection: Beyond Neonatal Microcephaly. *JAMA neurology*. 2016.
- 897 9. Mohr EL. Modeling Zika Virus-Associated Birth Defects in Nonhuman Primates. *Journal*  
898 *of the Pediatric Infectious Diseases Society*. 2018;7(suppl\_2):S60-s6.
- 899 10. Osuna CE, Whitney JB. Nonhuman Primate Models of Zika Virus Infection, Immunity,  
900 and Therapeutic Development. *The Journal of infectious diseases*. 2017;216(suppl\_10):S928-  
901 s34.
- 902 11. Dudley DM, Aliota MT, Mohr EL, Newman CM, Golos TG, Friedrich TC, et al. Using  
903 Macaques to Address Critical Questions in Zika Virus Research. *Annual review of virology*.  
904 2019.
- 905 12. Klionsky DJ, Abdalla FC, Abeliovich H, Abraham RT, Acevedo-Arozena A, Adeli K, et al.  
906 Guidelines for the use and interpretation of assays for monitoring autophagy. *Autophagy*.  
907 2012;8(4):445-544.
- 908 13. Dudley DM, Van Rompay KK, Coffey LL, Ardeshir A, Keesler RI, Bliss-Moreau E, et al.  
909 Miscarriage and stillbirth following maternal Zika virus infection in nonhuman primates. *Nature*  
910 *medicine*. 2018;24(8):1104-7.
- 911 14. Coffey LL, Keesler RI, Pesavento PA, Woolard K, Singapuri A, Watanabe J, et al.  
912 Intraamniotic Zika virus inoculation of pregnant rhesus macaques produces fetal neurologic  
913 disease. *Nature communications*. 2018;9(1):2414.
- 914 15. Mohr EL, Block LN, Newman CM, Stewart LM, Koenig M, Semler M, et al. Ocular and  
915 uteroplacental pathology in a macaque pregnancy with congenital Zika virus infection. *PloS one*.  
916 2018;13(1):e0190617.
- 917 16. Nguyen SM, Antony KM, Dudley DM, Kohn S, Simmons HA, Wolfe B, et al. Highly  
918 efficient maternal-fetal Zika virus transmission in pregnant rhesus macaques. *PLoS pathogens*.  
919 2017;13(5):e1006378.
- 920 17. Martinot AJ, Abbink P, Afacan O, Prohl AK, Bronson R, Hecht JL, et al. Fetal  
921 Neuropathology in Zika Virus-Infected Pregnant Female Rhesus Monkeys. *Cell*. 2018.

- 922 18. Steinbach RJ, Haese NN, Smith JL, Colgin LMA, MacAllister RP, Greene JM, et al. A  
923 neonatal nonhuman primate model of gestational Zika virus infection with evidence of  
924 microencephaly, seizures and cardiomyopathy. *PloS one*. 2020;15(1):e0227676.
- 925 19. Rajadhyaksha V. Conducting feasibilities in clinical trials: an investment to ensure a  
926 good study. *Perspect Clin Res*. 2010;1(3):106-9.
- 927 20. Huber HF, Jenkins SL, Li C, Nathanielsz PW. Strength of nonhuman primate studies of  
928 developmental programming: review of sample sizes, challenges, and steps for future work.  
929 *Journal of developmental origins of health and disease*. 2019:1-10.
- 930 21. Adebajo T, Godfred-Cato S, Viens L, Fischer M, Staples JE, Kuhnert-Tallman W, et al.  
931 Update: Interim Guidance for the Diagnosis, Evaluation, and Management of Infants with  
932 Possible Congenital Zika Virus Infection - United States, October 2017. *MMWR Morbidity and*  
933 *mortality weekly report*. 2017;66(41):1089-99.
- 934 22. Tarantal AF. Ultrasound Imaging in Rhesus (*Macaca mulatta*) and Long-tailed (*Macaca*  
935 *fascicularis*) Macaques: Reproductive and Research Applications. *Ultrasound Imaging: Elsevier*  
936 *Ltd.*; 2005.
- 937 23. Dudley DM, Aliota MT, Mohr EL, Weiler AM, Lehrer-Brey G, Weisgrau KL, et al. A  
938 rhesus macaque model of Asian-lineage Zika virus infection. *Nature communications*.  
939 2016;7:12204.
- 940 24. Hansen SG, Piatak M, Jr., Ventura AB, Hughes CM, Gilbride RM, Ford JC, et al.  
941 Immune clearance of highly pathogenic SIV infection. *Nature*. 2013;502(7469):100-4.
- 942 25. Lindsey HS, Calisher CH, Mathews JH. Serum dilution neutralization test for California  
943 group virus identification and serology. *Journal of clinical microbiology*. 1976;4(6):503-10.
- 944 26. Laughlin NK, Lasky RE, Giles NL, Luck ML. Lead effects on neurobehavioral  
945 development in the neonatal rhesus monkey (*Macaca mulatta*). *Neurotoxicology and teratology*.  
946 1999;21(6):627-38.
- 947 27. Schneider ML, Moore CF, Kraemer GW, Roberts AD, DeJesus OT. The impact of  
948 prenatal stress, fetal alcohol exposure, or both on development: perspectives from a primate  
949 model. *Psychoneuroendocrinology*. 2002;27(1-2):285-98.
- 950 28. Schneider ML, Roughton EC, Koehler AJ, Lubach GR. Growth and development  
951 following prenatal stress exposure in primates: an examination of ontogenetic vulnerability.  
952 *Child development*. 1999;70(2):263-74.
- 953 29. Schneider ML, Suomi SJ. Neurobehavioral Assessment in Rhesus Monkey Neonates  
954 (*Macaca mulatta*): Developmental Changes, Behavioral Stability and Early Experience. *Infant*  
955 *Behavior and Development*. 1992;15:155-77.
- 956 30. Coe CL, Lubach GR, Crispen HR, Shirtcliff EA, Schneider ML. Challenges to maternal  
957 wellbeing during pregnancy impact temperament, attention, and neuromotor responses in the  
958 infant rhesus monkey. *Developmental psychobiology*. 2010;52(7):625-37.
- 959 31. Brazelton TB. Assessment of the infant at risk. *Clinical obstetrics and gynecology*.  
960 1973;16(1):361-75.
- 961 32. Huang Y, Danis RP, Pak JW, Luo S, White J, Zhang X, et al. Development of a semi-  
962 automatic segmentation method for retinal OCT images tested in patients with diabetic macular  
963 edema. *PloS one*. 2013;8(12):e82922.
- 964 33. Robson AG, Nilsson J, Li S, Jalali S, Fulton AB, Tormene AP, et al. ISCEV guide to  
965 visual electrodiagnostic procedures. *Documenta ophthalmologica Advances in ophthalmology*.  
966 2018;136(1):1-26.
- 967 34. Wong CW, Ng SR, Cheung CM, Wong TY, Mathur R. ZIKA-RELATED MACULOPATHY.  
968 *Retinal cases & brief reports*. 2017.
- 969 35. Sitdikova G, Zakharov A, Janackova S, Gerasimova E, Lebedeva J, Inacio AR, et al.  
970 Isoflurane suppresses early cortical activity. *Annals of clinical and translational neurology*.  
971 2014;1(1):15-26.
- 972 36. Hall III JW. *New Handbook of Auditory Evoked Responses*: Pearson; 2006. 736 p.

- 973 37. Avants BB, Epstein CL, Grossman M, Gee JC. Symmetric diffeomorphic image  
974 registration with cross-correlation: evaluating automated labeling of elderly and  
975 neurodegenerative brain. *Med Image Anal.* 2008;12(1):26-41.
- 976 38. Tustison NJ, Avants BB, Cook PA, Zheng Y, Egan A, Yushkevich PA, et al. N4ITK:  
977 improved N3 bias correction. *IEEE Trans Med Imaging.* 2010;29(6):1310-20.
- 978 39. Shi Y, Budin F, Yapuncich E, Rumple A, Young JT, Payne C, et al. UNC-Emory Infant  
979 Atlases for Macaque Brain Image Analysis: Postnatal Brain Development through 12 Months.  
980 *Frontiers in neuroscience.* 2016;10:617.
- 981 40. Johnson HH, G. Williams, K. BRAINSFit: mutual information registrations of whole-brain  
982 3D images, using the insight toolkit. *Insight Journal.* 2007.
- 983 41. Van Leemput K, Maes F, Vandermeulen D, Suetens P. Automated model-based bias  
984 field correction of MR images of the brain. *IEEE Trans Med Imaging.* 1999;18(10):885-96.
- 985 42. Van Leemput K, Maes F, Vandermeulen D, Suetens P. Automated model-based tissue  
986 classification of MR images of the brain. *IEEE Trans Med Imaging.* 1999;18(10):897-908.
- 987 43. Prastawa M, Bullitt E, Moon N, Van Leemput K, Gerig G. Automatic brain tumor  
988 segmentation by subject specific modification of atlas priors. *Acad Radiol.* 2003;10(12):1341-8.
- 989 44. Wang J, Vachet C, Rumple A, Gouttard S, Ouziel C, Perrot E, et al. Multi-atlas  
990 segmentation of subcortical brain structures via the AutoSeg software pipeline. *Front*  
991 *Neuroinform.* 2014;8:7-.
- 992 45. Sullivan GM, Feinn R. Using Effect Size-or Why the P Value Is Not Enough. *J Grad Med*  
993 *Educ.* 2012;4(3):279-82.
- 994 46. Myers RE. The gross pathology of the rhesus monkey placenta. *The Journal of*  
995 *reproductive medicine.* 1972;9(4):171-98.
- 996 47. Bunton TE. Incidental lesions in nonhuman primate placentae. *Veterinary pathology.*  
997 1986;23(4):431-8.
- 998 48. Fouda GG, Martinez DR, Swamy GK, Permar SR. The Impact of IgG transplacental  
999 transfer on early life immunity. *Immunohorizons.* 2018;2(1):14-25.
- 1000 49. Leal MC, van der Linden V, Bezerra TP, de Valois L, Borges ACG, Antunes MMC, et al.  
1001 Characteristics of Dysphagia in Infants with Microcephaly Caused by Congenital Zika Virus  
1002 Infection, Brazil, 2015. *Emerging infectious diseases.* 2017;23(8):1253-9.
- 1003 50. Yopez JB, Murati FA, Pettito M, Penaranda CF, de Yopez J, Maestre G, et al.  
1004 Ophthalmic Manifestations of Congenital Zika Syndrome in Colombia and Venezuela. *JAMA*  
1005 *ophthalmology.* 2017;135(5):440-5.
- 1006 51. de Carvalho Leal M, Ramos DS, Caldas Neto SS. Hearing Loss From Congenital Zika  
1007 Virus Infection. *Topics in magnetic resonance imaging : TMRI.* 2019;28(1):19-22.
- 1008 52. Doyle WJ, Saad MM, Fria TJ. Maturation of the auditory brain stem response in rhesus  
1009 monkeys (*Macaca mulatta*). *Electroencephalography and clinical neurophysiology.*  
1010 1983;56(2):210-23.
- 1011 53. Ribeiro BNF, Muniz BC, Gasparetto EL, Ventura N, Marchiori E. Congenital Zika  
1012 syndrome and neuroimaging findings: what do we know so far? *Radiologia brasileira.*  
1013 2017;50(5):314-22.
- 1014 54. Moreira ME. Vertical Exposure to Zika Virus and Its Consequences for Child  
1015 Neurodevelopment (ZIKVIRUSIFF) [updated 5.3.18. Available from:  
1016 <https://ClinicalTrials.gov/show/NCT03255369>.
- 1017 55. Rojas MA. Neurodevelopment Outcome of Newborns Exposed to Zika Virus (ZIKV) in  
1018 Utero 2019 [updated 1.17.19. Available from: <https://ClinicalTrials.gov/show/NCT02943304>.
- 1019 56. Institut National de la Santé Et de la Recherche Médicale F. Zika Virus Infection's  
1020 Neonatal and Pediatric Consequences in French Department of America [updated 8.30.16.  
1021 Available from: <https://ClinicalTrials.gov/show/NCT02810210>.



- 1022 57. Adams Waldorf KM, Stencel-Baerenwald JE, Kapur RP, Studholme C, Boldenow E,  
1023 Vornhagen J, et al. Fetal brain lesions after subcutaneous inoculation of Zika virus in a pregnant  
1024 nonhuman primate. *Nature medicine*. 2016.
- 1025 58. Hirsch AJ, Roberts VHJ, Grigsby PL, Haese N, Schabel MC, Wang X, et al. Zika virus  
1026 infection in pregnant rhesus macaques causes placental dysfunction and immunopathology.  
1027 *Nature communications*. 2018;9(1):263.
- 1028 59. Zika in Infants and Pregnancy (ZIP) [Available from:  
1029 <https://ClinicalTrials.gov/show/NCT02856984>.
- 1030 60. ZIKAlliance Children Cohort (ZIKAllianceCH) [Available from:  
1031 <https://ClinicalTrials.gov/show/NCT03393286>.
- 1032 61. Neurodevelopment Outcome of Newborns Exposed to Zika Virus (ZIKV) in Utero  
1033 [Available from: <https://ClinicalTrials.gov/show/NCT02943304>.
- 1034 62. Marquezan MC, Ventura CV, Sheffield JS, Golden WC, Omiadze R, Belfort R, Jr., et al.  
1035 Ocular effects of Zika virus-a review. *Survey of ophthalmology*. 2018;63(2):166-73.
- 1036 63. Miyake Y, Shinoda K. Chapter 8 - Clinical Electrophysiology. In: Ryan SJ, Sadda SR,  
1037 Hinton DR, Schachat AP, Sadda SR, Wilkinson CP, et al., editors. *Retina (Fifth Edition)*.  
1038 London: W.B. Saunders; 2013. p. 202-26.
- 1039 64. Conway BR. The Organization and Operation of Inferior Temporal Cortex. *Annual review*  
1040 *of vision science*. 2018;4:381-402.
- 1041 65. Aleman TS, Ventura CV, Cavalcanti MM, Serrano LW, Traband A, Nti AA, et al.  
1042 Quantitative Assessment of Microstructural Changes of the Retina in Infants With Congenital  
1043 Zika Syndrome. *JAMA ophthalmology*. 2017;135(10):1069-76.
- 1044 66. Barbosa MHM, Magalhaes-Barbosa MC, Robaina JR, Prata-Barbosa A, Lima M, Cunha  
1045 A. Auditory findings associated with Zika virus infection: an integrative review. *Brazilian journal*  
1046 *of otorhinolaryngology*. 2019.
- 1047 67. Syggelou A, Fanos V, Iacovidou N. Acute otitis media in neonatal life: a review. *Journal*  
1048 *of chemotherapy (Florence, Italy)*. 2011;23(3):123-6.
- 1049 68. de Fatima Viana Vasco Aragao M, van der Linden V, Petribu NC, Valenca MM, Parizel  
1050 PM, de Mello RJV. Congenital Zika Syndrome: The Main Cause of Death and Correspondence  
1051 Between Brain CT and Postmortem Histological Section Findings From the Same Individuals.  
1052 *Topics in magnetic resonance imaging : TMRI*. 2019;28(1):29-33.
- 1053 69. Zwaigenbaum L, Bauman ML, Choueiri R, Fein D, Kasari C, Pierce K, et al. Early  
1054 Identification and Interventions for Autism Spectrum Disorder: Executive Summary. *Pediatrics*.  
1055 2015;136 Suppl 1:S1-9.
- 1056

1057

1058

1059 **Supporting Information Captions**

1060 **S1 figure. Scoring of representative ERG and VEP waveforms.** These ERG and VEP

1061 waveforms were recorded simultaneously from control infant r18076. Red solid arrows:

1062 amplitude of labelled waveform features. ERG A- and VEP N2-wave amplitudes are measured

1063 relative to pre-flash voltage; ERG B-and VEP P2-wave amplitude measured from preceding A-

1064 and N2-waves, respectively (horizontal dotted line). Red dashed arrows: latency-to-peak, all

1065 measured from the onset of the flash stimulus (vertical dotted line). The neonatal rhesus

1066 photopic ERG contains a prominent short-latency wave (\*) prior to the B-wave that decreases in

1067 prominence with age and was not quantified for this study.

1068 **S2 figure. Cortical and subcortical volumetric analysis work flow and parcellations.** (A)

1069 AutoSeg grey matter parcellation with axial (left), sagittal (middle) and coronal (right) views. (B)

1070 AutoSeg subcortical structure parcellation with axial (left), sagittal (middle) and coronal (right)

1071 views. Parcellations are overlaid on the subject T1w image, registered to the Emory-Cross 2

1072 week infant template.

1073 **S3 Figure. Maternal viremia and antibody response.** (A) Maternal plasma vRNA loads were

1074 measured by qRT-PCR. (B) Estimated EC90 values for serum neutralization of ZIKV assessed

1075 prior to infection, 7 dpi, 28 dpi and at maternal necropsy. (C) Estimated EC50 values for serum

1076 ZIKV IgG titers obtained prior to infection, 7 dpi, 28 dpi and at maternal necropsy. The dashed

1077 line indicates the limit of detection.

1078 **S4 figure. PRNT and whole virion ELISA dose response curves.**

1079 **S5 figure. Fetal abdominal circumference, femur length and heart rate measurements.**

1080 **S6 figure. Infant IgM titers, body fluid viral loads and PRNTs.** Sera from ZIKV-exposed

1081 infants were evaluated for the presence of ZIKV-specific IgM by two commercial assays: Abcam

1082 (A) and Euroimmun (B). The manufacturer provided positive and negative human IgM controls

1083 are shown in grey. Pre and post-ZIKV infection serum collected from an adult rhesus macaque

1084 (244667) was used as a species-specific positive and negative control (shown in black). The  
1085 dashed line indicates the positive cutoff value for each assay. (C) Infant body fluids (plasma,  
1086 urine, CSF) were assessed for the presence of ZIKV RNA by qRT-PCR at the days indicated  
1087 and were negative. NA, not applicable (because no samples were available from the stillborn  
1088 fetus). (D) PRNTs were performed on infant serum from day of life (DOL) 2-5 from liveborn  
1089 infants and ED90 values were reported in comparison with maternal PRNT ED90 values from  
1090 necropsy.

1091 **S7 figure. Infant PRNT dose response curves.** Infant serum was collected at the day of life  
1092 (DOL) indicated.

1093 **S8 figure. Localization of ZIKV RNA by ISH in brain tissues from ZIKV-exposed infants.**

1094 (A) ZIKV genomic RNA (red dots) in a ZIKV-exposed murine lateral geniculate brain section  
1095 (20x). ZIKV-exposed fetus/infant brain sections exposed to ZIKV RNA probe (10x) (B) 527421  
1096 cerebral cortex (rostral to LGN), (C) 499874 cerebral cortex, (D) 226691 cerebral cortex, (E)  
1097 424847 cerebrum containing the lateral geniculate nucleus, (F) 416597 cerebellar brain section.

1098 **S1 appendix.** Effect size and post-hoc sample size calculations SAS code.

Infant age (days)

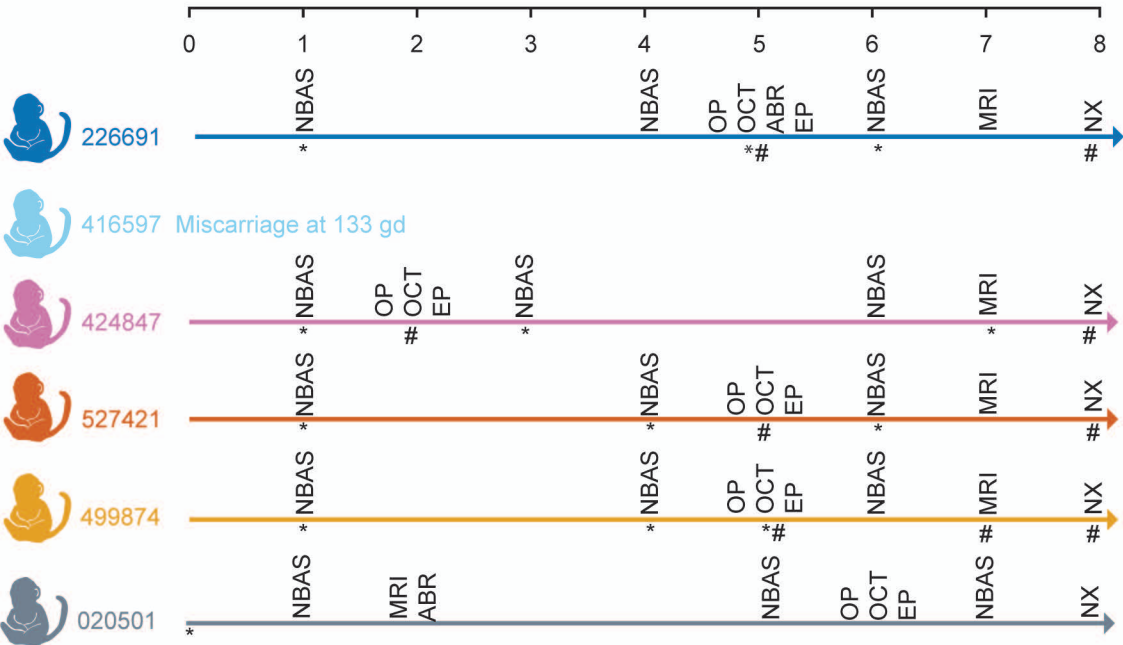

# Gestational age (days)

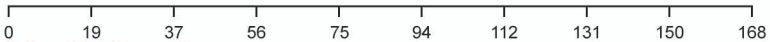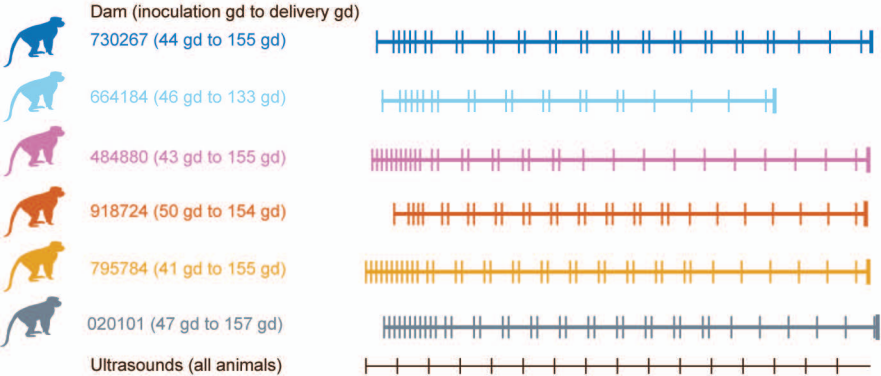

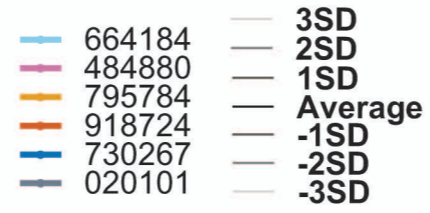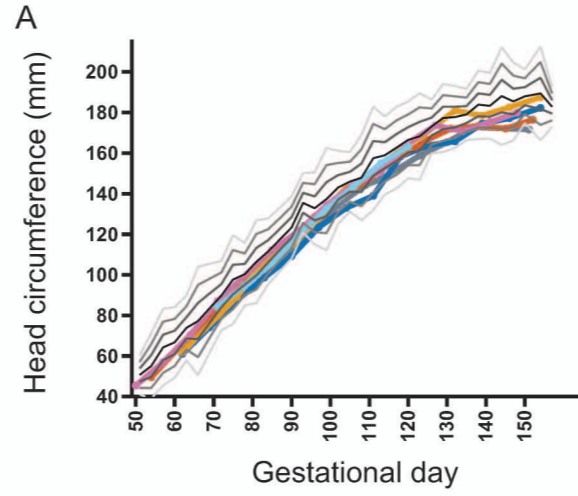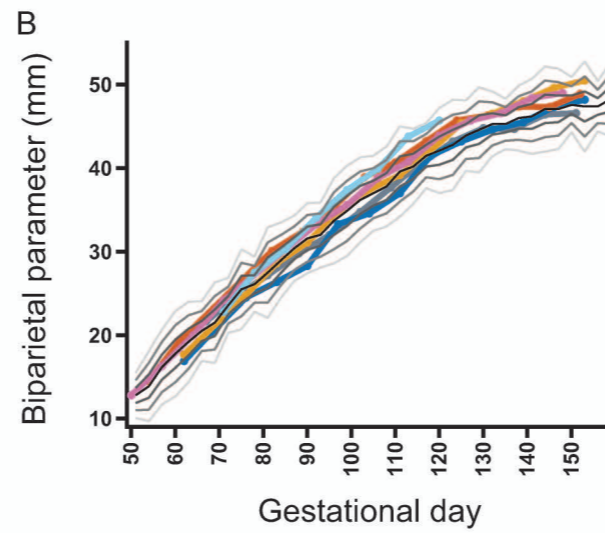

ZIKV-infected

Control

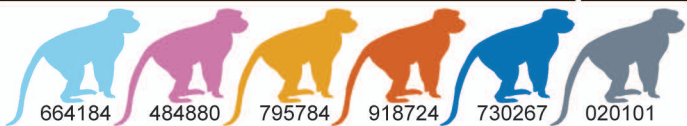

Uterus placental bed

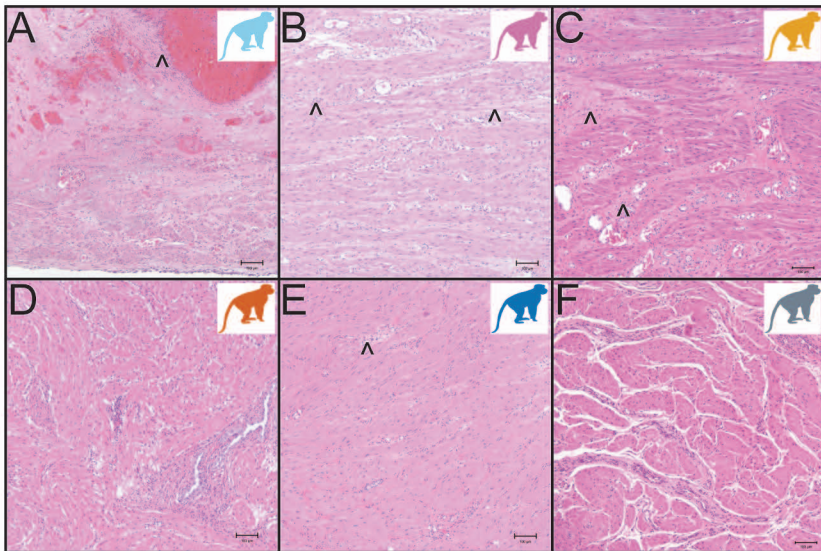

Placental villi

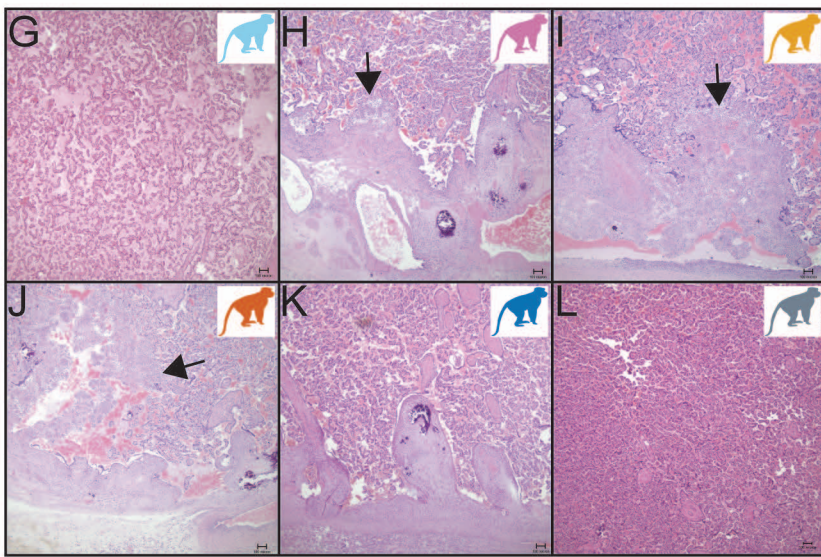

A

| Tissue Source                | Tissue Name                 | Animal ID (dam ID/fetus-infant ID) |          |               |          |                   |          |               |          |               |          |
|------------------------------|-----------------------------|------------------------------------|----------|---------------|----------|-------------------|----------|---------------|----------|---------------|----------|
|                              |                             | 664184/416597                      |          | 484880/424847 |          | 795784/499874     |          | 918724/527421 |          | 730267/226691 |          |
|                              |                             | qRT-PCR                            | ISH      | qRT-PCR       | ISH      | qRT-PCR           | ISH      | qRT-PCR       | ISH      | qRT-PCR       | ISH      |
| Maternal tissues             | Decidua                     | ND                                 | positive | ND            | negative | 56 copies vRNA/mg | negative | ND            | negative | ND            | negative |
|                              | Placental bed               | ND                                 | NT       | ND            | NT       | ND                | NT       | ND            | NT       | ND            | NT       |
|                              | Uterus                      | ND                                 | NT       | ND            | NT       | ND                | NT       | ND            | NT       | ND            | NT       |
|                              | Vagina                      | ND                                 | NT       | ND            | NT       | ND                | NT       | ND            | NT       | ND            | NT       |
| Fetal extraembryonic tissues | Amniotic/chorionic membrane | ND                                 | positive | ND            | negative | ND                | negative | ND            | negative | ND            | negative |
|                              | Placental disc 1            | ND                                 | negative | ND            | negative | ND                | negative | ND            | negative | ND            | negative |
|                              | Placental disc 2            | ND                                 | negative | ND            | negative | ND                | negative | ND            | negative | ND            | negative |
|                              | Umbilical cord              | ND                                 | NT       | ND            | NT       | ND                | NT       | ND            | NT       | ND            | NT       |
|                              | Amniotic fluid              | NC                                 | NA       | ND            | NA       | NC                | NA       | ND            | NA       | ND            | NA       |

B

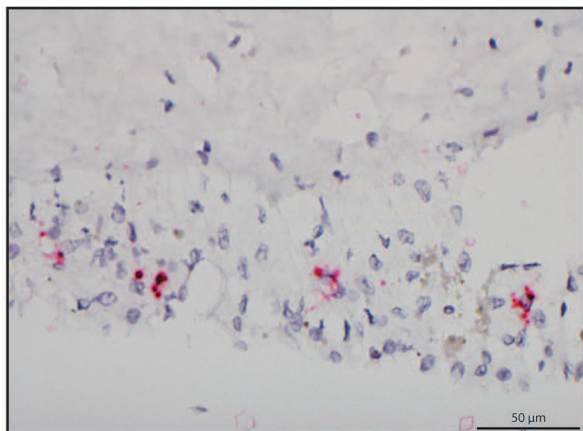

Decidua

C

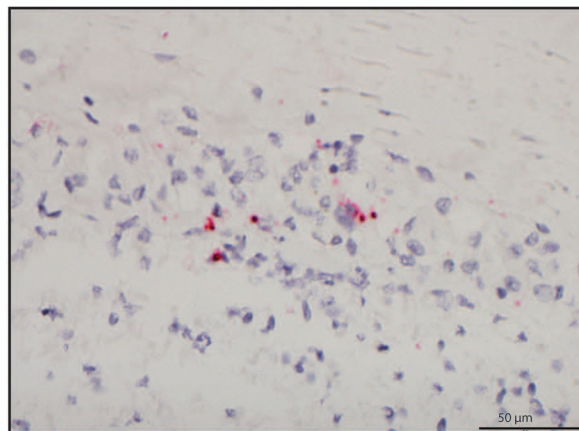

Amniotic/chorionic membrane



ZIKV-exposed

Control

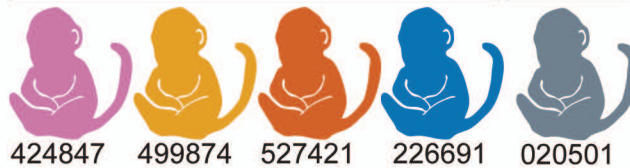

A

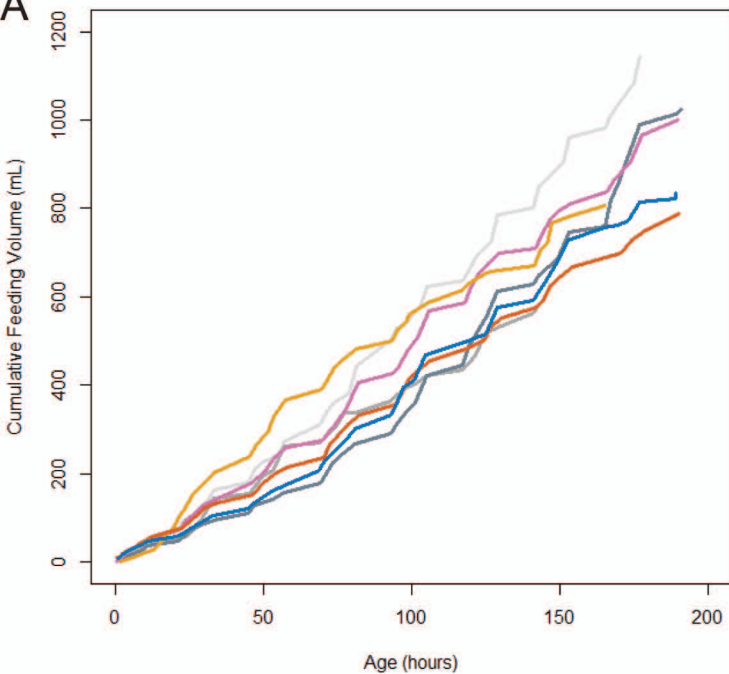

B

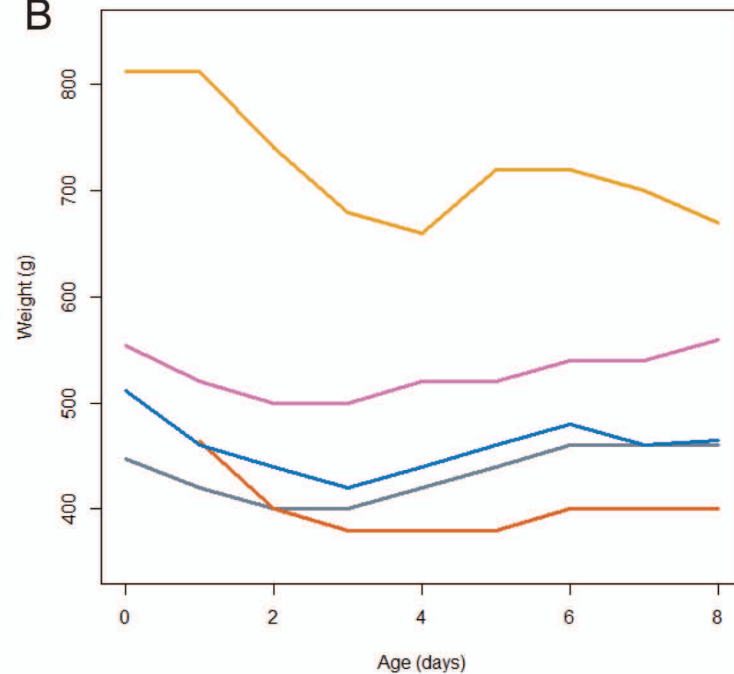

C

| Outcome                   | Observed effect size | Sample Size Allocation 1:1 |        |         | Sample Size Allocation 2:1 |        |         |
|---------------------------|----------------------|----------------------------|--------|---------|----------------------------|--------|---------|
|                           |                      | N: ZIKV                    | N: Ctr | Total N | N: ZIKV                    | N: Ctr | Total N |
| Weight Gain Trajectory    | 1.23                 | 12                         | 12     | 24      | 18                         | 9      | 27      |
| Feeding Volume Trajectory | 0.9                  | 21                         | 21     | 42      | 31                         | 16     | 47      |

ZIKV-exposed

Control

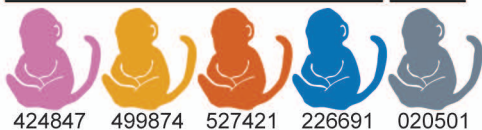

### A Orientation

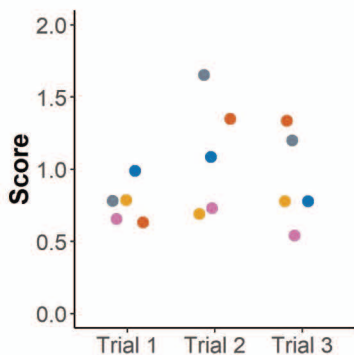

### B Motor Maturity & Activity

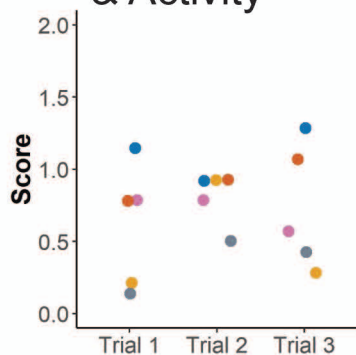

### C Sensory

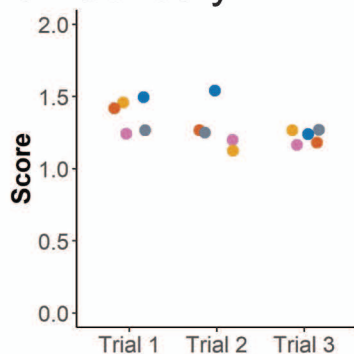

### D State Control

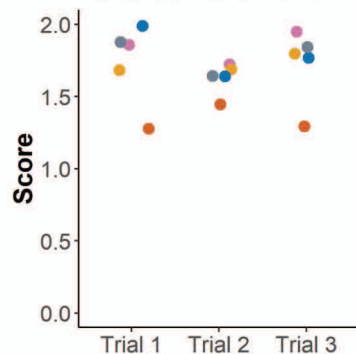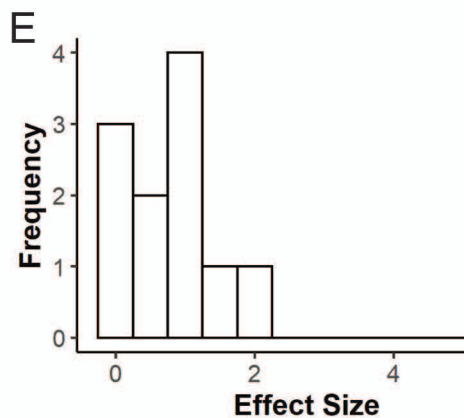

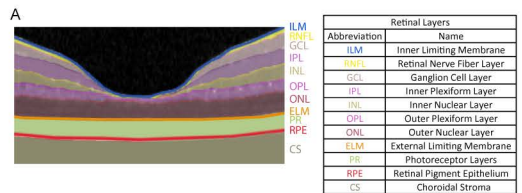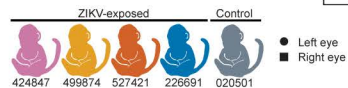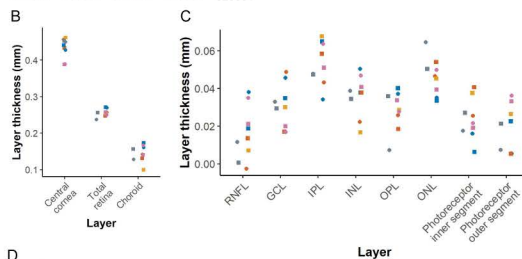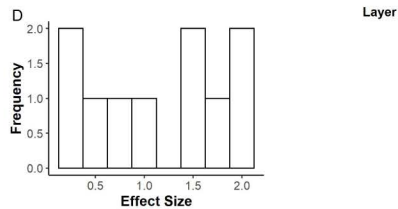

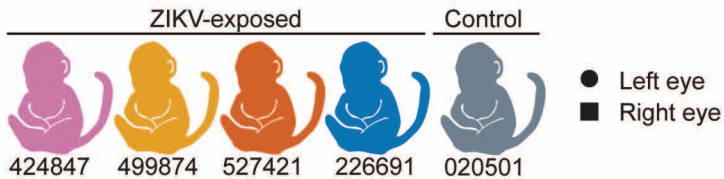

A

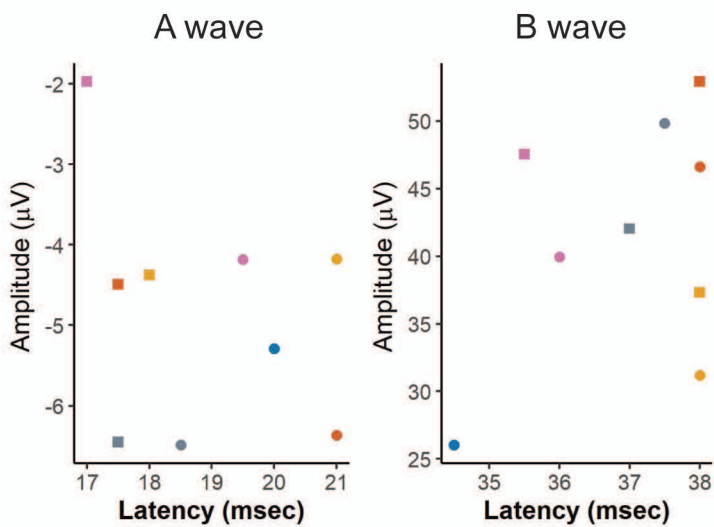

B

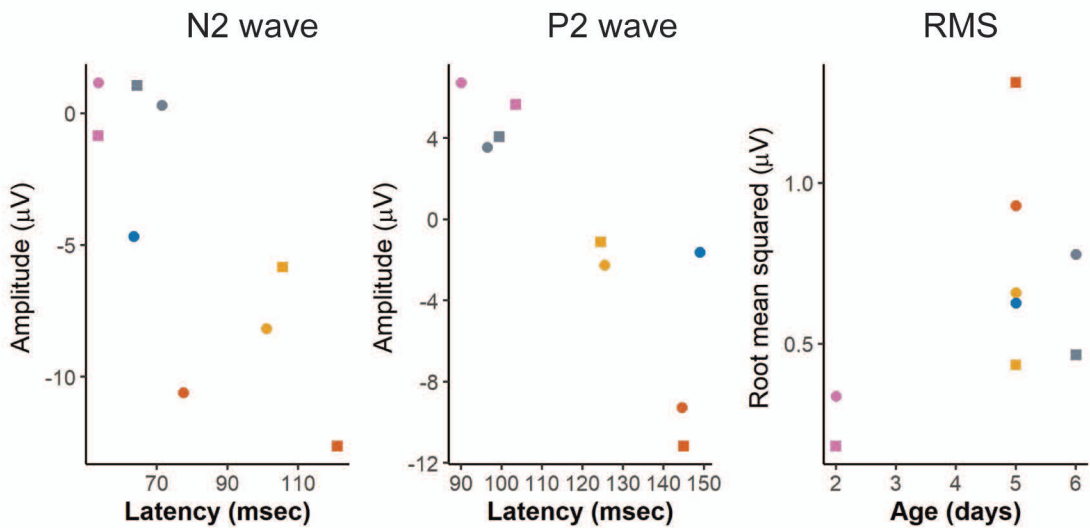

C

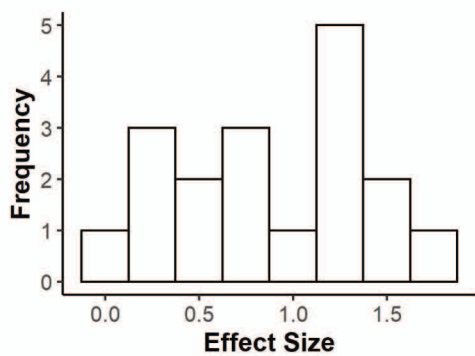

ZIKV-exposed

Control

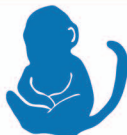

226691

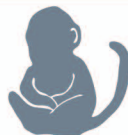

020501

A

Left ear

Right ear

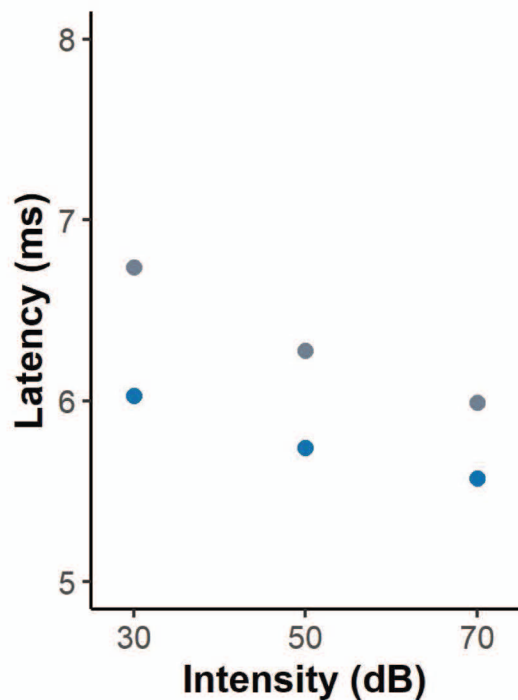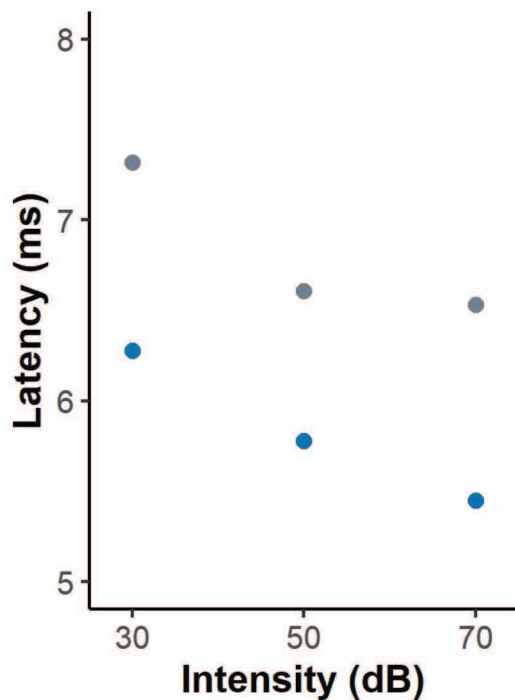

B

| Ear side | Intensity (dB) | Observed effect size | Sample Size Allocation 1:1 |        |         | Sample Size Allocation 2:1 |        |         |
|----------|----------------|----------------------|----------------------------|--------|---------|----------------------------|--------|---------|
|          |                |                      | N: ZIKV                    | N: Ctr | Total N | N: ZIKV                    | N: Ctr | Total N |
| Left     | 30             | 1.41                 | 9                          | 9      | 18      | 14                         | 7      | 21      |
|          | 50             | 1.41                 | 9                          | 9      | 18      | 14                         | 7      | 21      |
|          | 70             | 1.41                 | 9                          | 9      | 18      | 14                         | 7      | 21      |
| Right    | 30             | 1.41                 | 9                          | 9      | 18      | 14                         | 7      | 21      |
|          | 50             | 1.41                 | 9                          | 9      | 18      | 14                         | 7      | 21      |
|          | 70             | 1.41                 | 9                          | 9      | 18      | 14                         | 7      | 21      |

ZIKV-exposed

Control

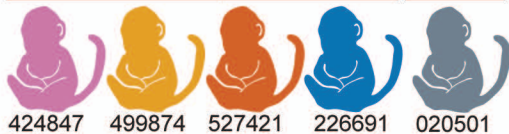

A

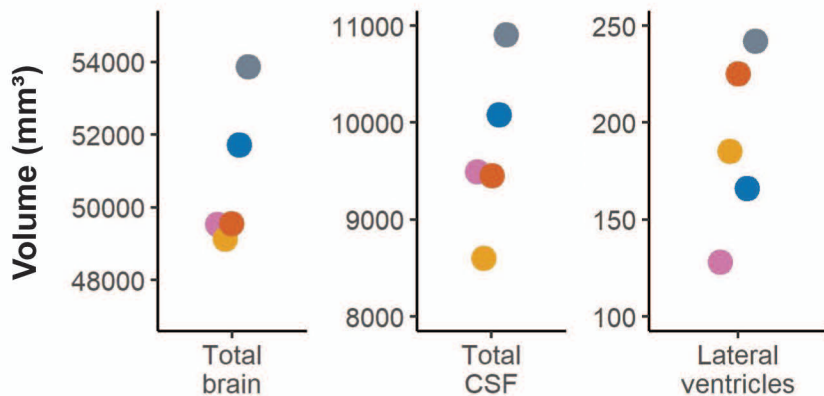

B

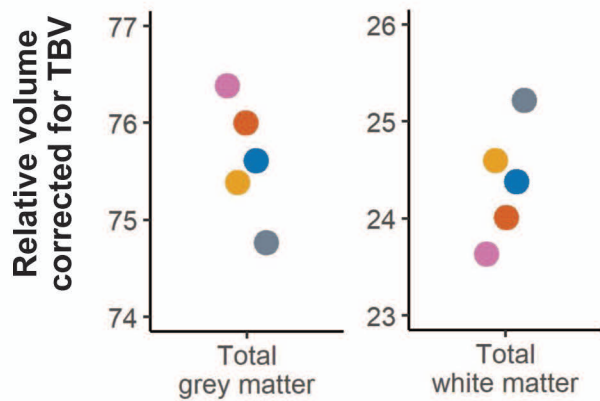

C

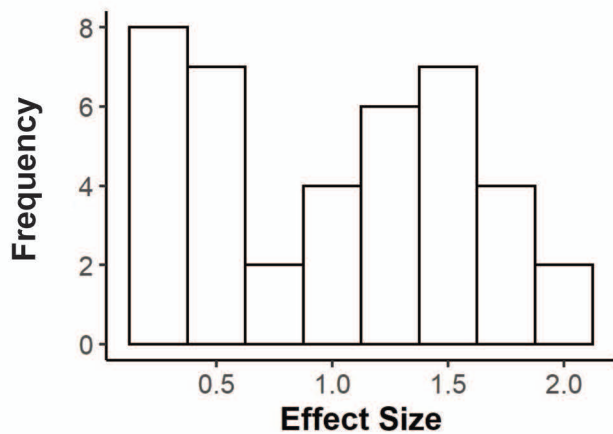

ZIKV-exposed

Control

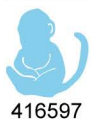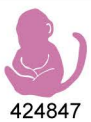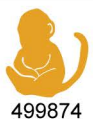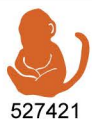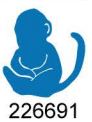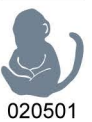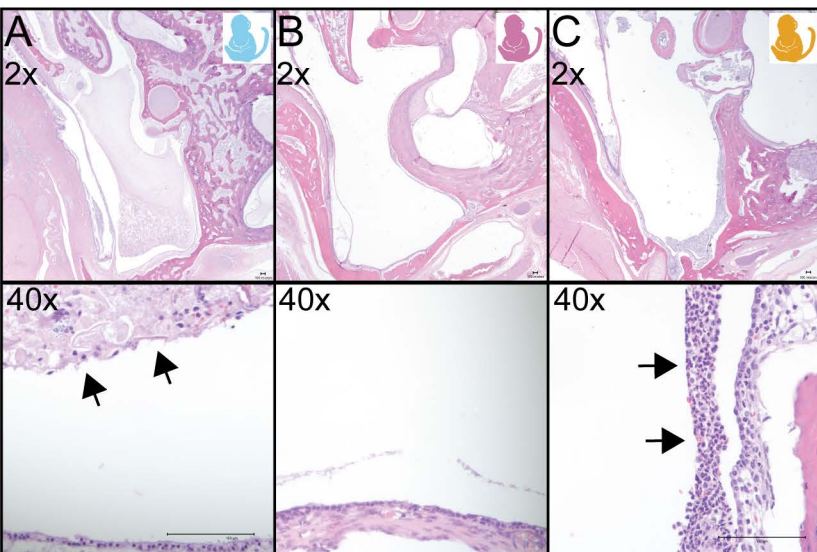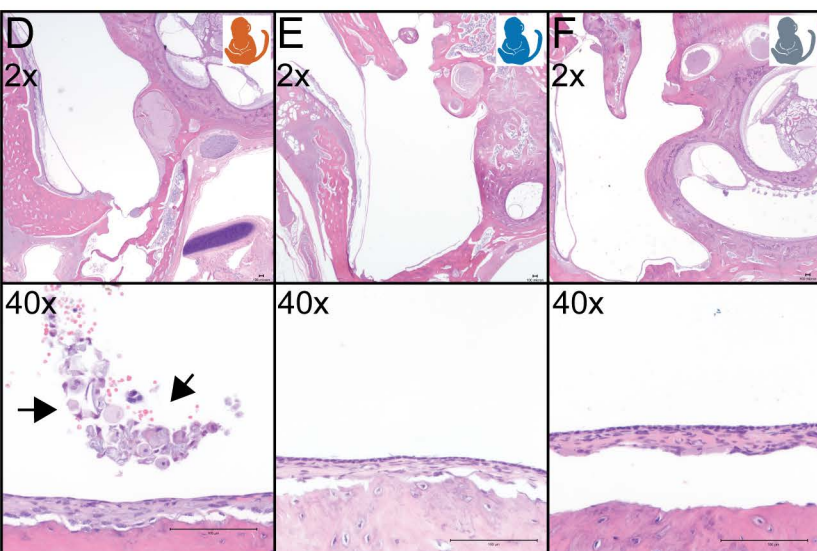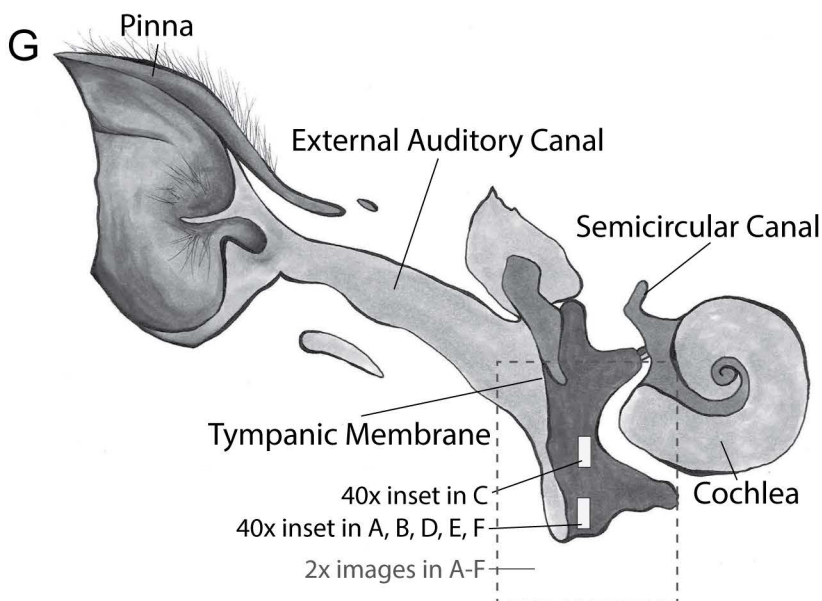

ZIKV-exposed

Control

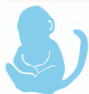

416597

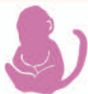

424847

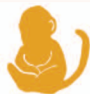

499874

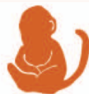

527421

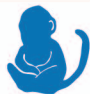

226691

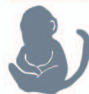

020501

Lung

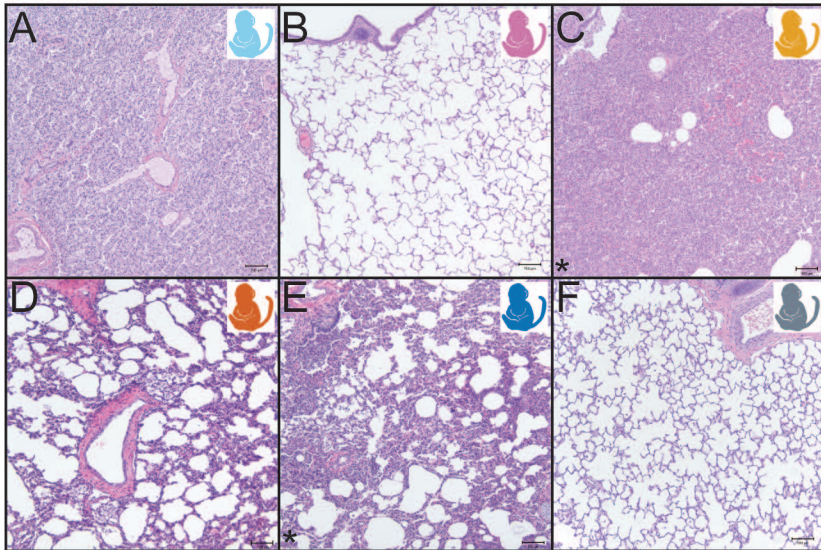

Source: http://biorxiv.org/content/10.1101/726018v2.full.pdf
